# Supplementary material
Source: PubMed Central journal article supplement (PMC5338665)
Supplement: supp_pp.16.01457_PP2016-01457DR1_Supplemental_Materialfigs.pdf [file supp_pp.16.01457_PP2016-01457DR1_Supplemental_Materialfigs.pdf]

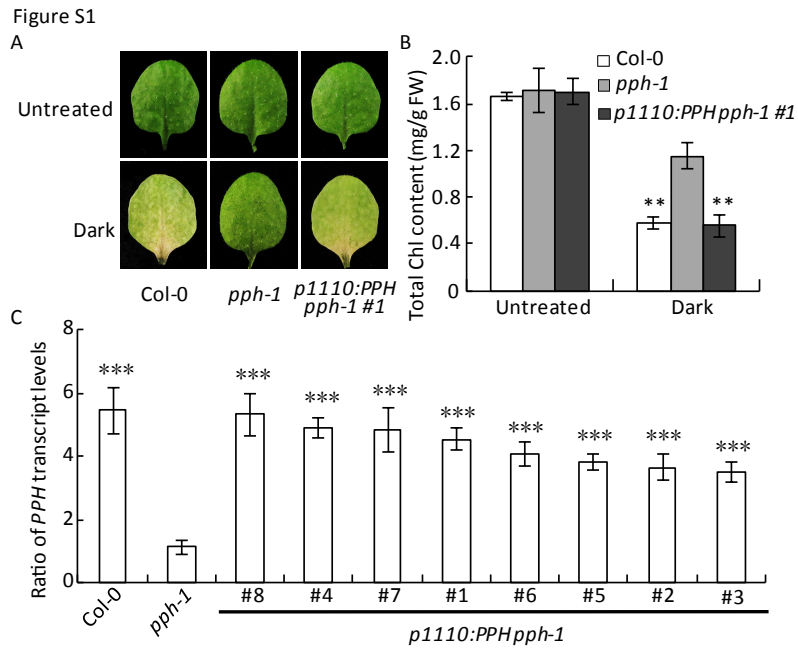

**Figure S1 The 1.11-kb fragment upstream of *PPH* start codon contains the core *PPH* promoter**

**A**, Expression of *p1110:PPH* rescued the stay-green phenotype of *pph-1*. Detached 5<sup>th</sup> and 6<sup>th</sup> rosette leaves of 3-week-old transgenic plants (T3) were incubated in darkness for 4 days. *p1110*, 1110-bp *PPH* promoter fragment.

**B**, Chl contents in the detached leaves shown in **A**. *pph-1* was included as the negative control.

**C**, Ratios of *PPH* transcript levels after dark treatment over those untreated in the leaves of *p1110:PPH pph-1*. *pph-1* was included as the negative control.

In **B** and **C**, data are means  $\pm$  SD of 2 biological repeats. \*\*  $P < 0.01$ , \*\*\*  $P < 0.001$  (*t*-tests).

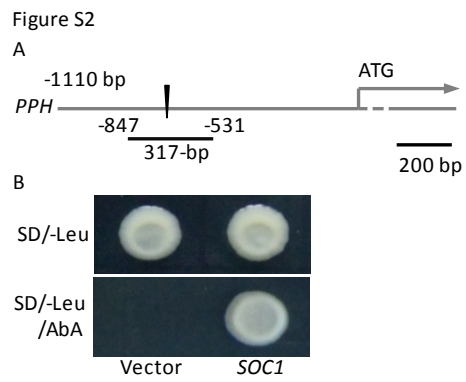

**Figure S2 SOC1 protein interacts with *PPH* promoter in an Y1H assay**

**A**, A schematic diagram of the *PPH* promoter showing the positions of CARG-box (black triangle) and the 317-bp bait fragment containing CARG-box, between -847 and -531 bp upstream of the *PPH* start codon.

**B**, Transformed yeast cells containing both the 317-bp bait and the prey (*SOC1*) constructs were plated on the selective medium (SD/-Leu/AbA). Vector, empty vector control; AbA, Aureobasidin A.

Figure S3

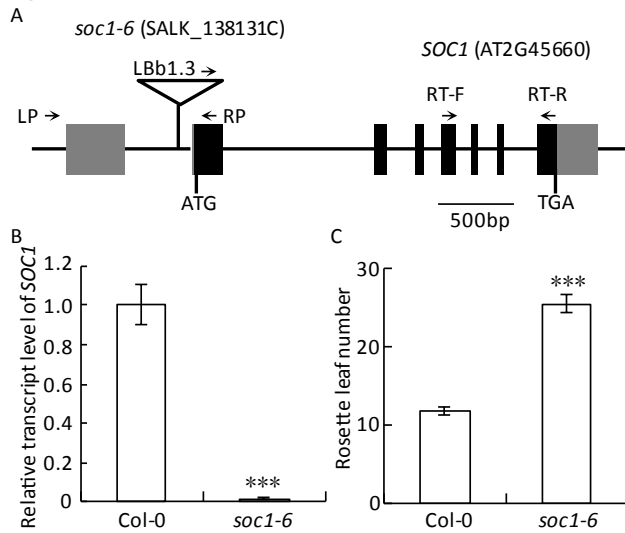

**Figure S3 *soc1-6* is a late-flowering mutant**

**A**, A schematic diagram of the *soc1-6* (SALK\_138131C) mutant showing the position of T-DNA insertion. Black boxes indicate exons of *SOC1*, and gray boxes represent the UTR of *SOC1*. Genotyping primers (LP, RP and LbB1.3) were used to identify homozygous lines of *soc1-6*, and RT-qPCR primers (RT-F and RT-R) were used to analyze the expression of *SOC1*.

**B**, Relative transcript levels of *SOC1* in *soc1-6* and Col-0.

**C**, The rosette leaf number of *soc1-6* at the bolting stage compared to that of WT under long-day conditions.

In **B** and **C**, data are means  $\pm$  SD of 2 biological repeats. \*\*\*  $P < 0.001$  (*t*-tests).

Figure S4

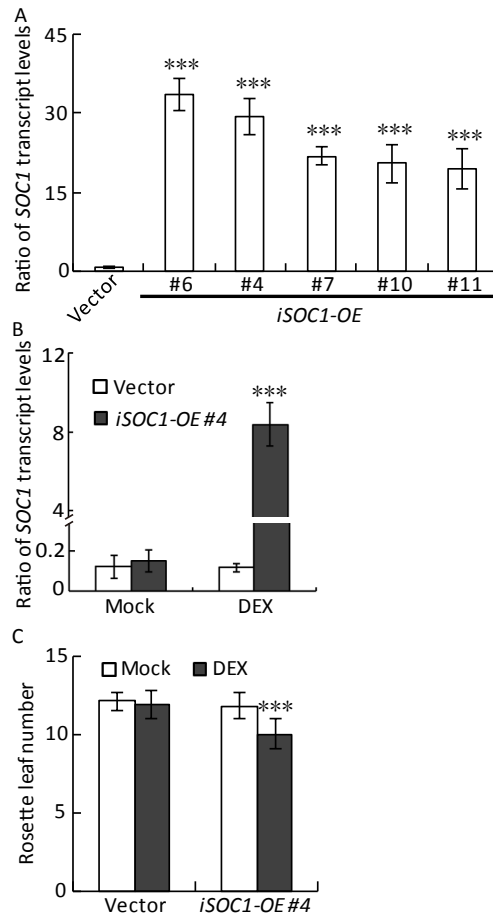

**Figure S4 DEX treatment could induce the transcription of *SOC1* in *iSOC1-OE* transgenic lines (T3)**

**A**, Ratios of *SOC1* transcript levels after DEX treatment over those treated by Mock in *iSOC1-OE* transgenic plants. Detached 5<sup>th</sup> and 6<sup>th</sup> rosette leaves of 3-week-old plants were treated with DEX and *SOC1* mRNA levels were quantified by RT-qPCR after 6 hours.

**B**, Ratios (Dark/Untreated) of *SOC1* transcript levels in the leaves shown in Figure 1G.

**C**, Induced overexpression of *SOC1* caused early flowering phenotype. Five-day-old (after germination) plants were sprayed with DEX every other day. Mock, water; DEX, 30  $\mu$ M dexamethasone water solution; vector, empty vector control.

Data are means  $\pm$  SD of 2 biological repeats. \*\*\* P < 0.001 (*t*-tests).



Figure S5

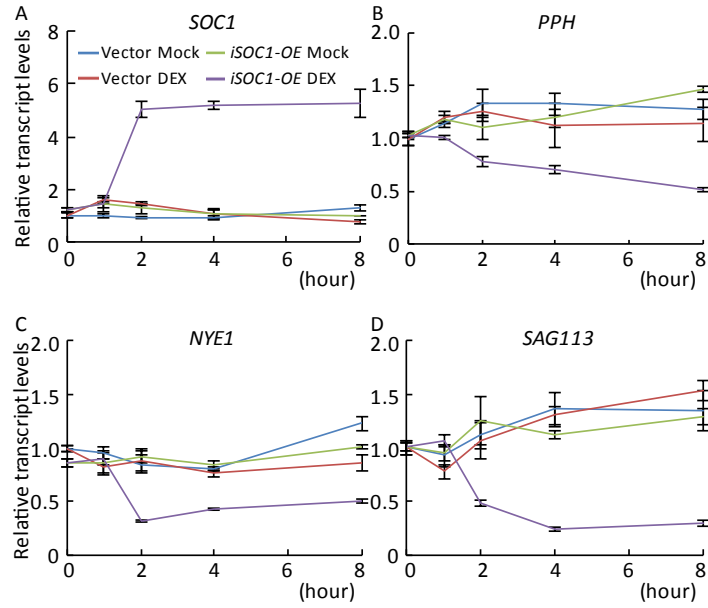

**Figure S5 An induced *SOC1* (A) inhibits *PPH* (B), *NYE1* (C) and *SAG113* (D) transcriptions in a short time window during dark treatment**

Detached 5<sup>th</sup> and 6<sup>th</sup> rosette leaves of 3-week-old plants were incubated in darkness for 2 days before Mock or DEX treatment. Transcript levels of respective genes in Col-0 at hour 0 were set to 1. Mock, water; DEX, 30  $\mu$ M dexamethasone water solution; vector, empty vector control. Data are means  $\pm$  SD of 2 biological repeats.

Figure S6

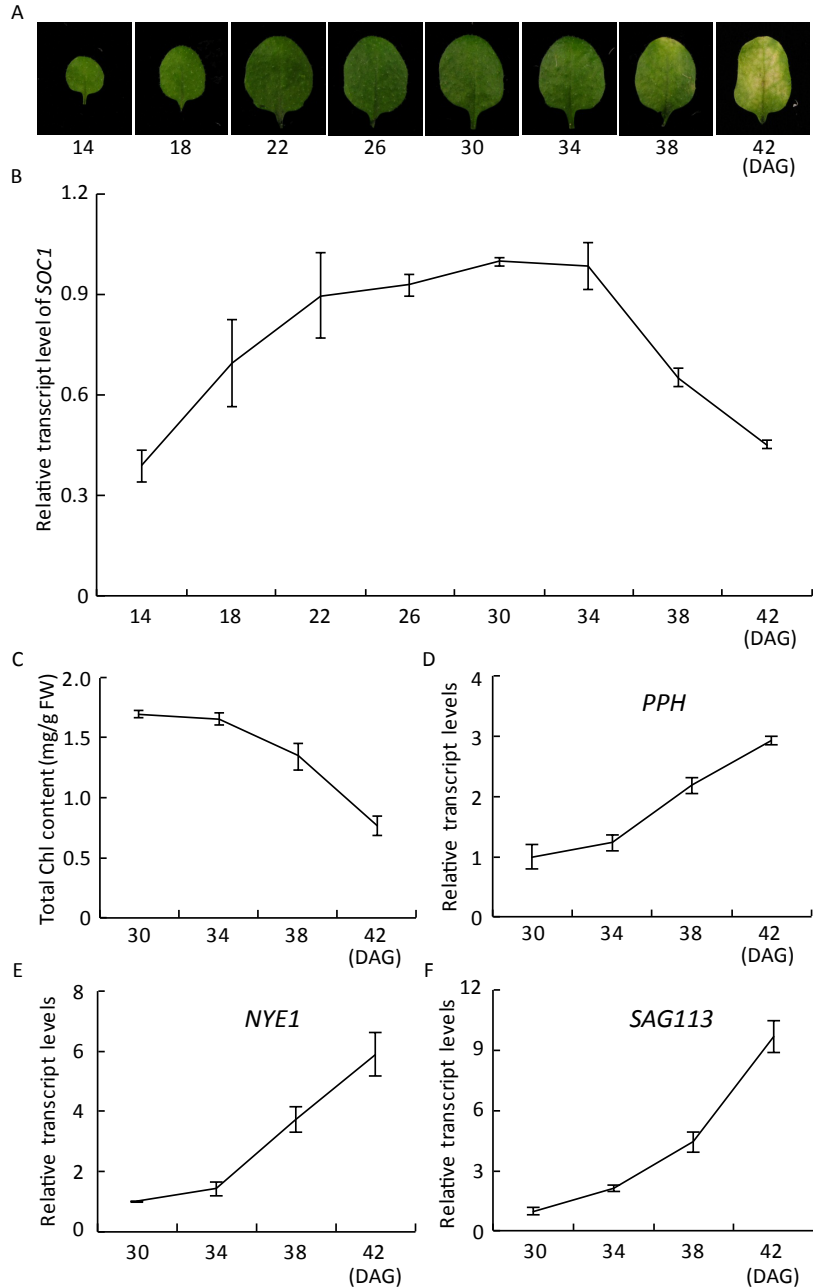

**Figure S6** Developmental senescence phenotype of the wild-type *Arabidopsis* leaves

**A**, The 5<sup>th</sup> and 6<sup>th</sup> rosette leaves from 14, 18, 22, 26, 30, 34, 38, 42-day-old (after germination) Col-0 plants. DAG, days after germination.

**B**, Relative transcript levels of *SOC1* at each time point shown in **A**. To facilitate the comparison between *SOC1* expression and some *SAGs'* expressions during the late developmental stage, the relative transcript level of *SOC1* in 30-day-old leaves was set to 1.

**C**, Chl contents in the leaves shown in **A** from 30 DAG to 42 DAG.

**D-F**, Relative transcript levels of *PPH*, *NYE1*, and *SAG113* from 30 DAG to 42 DAG in the leaves shown in **A**. The transcript level of each gene at day 30 was set to 1.

In **B-F**, data are means  $\pm$  SD of 2 biological repeats.

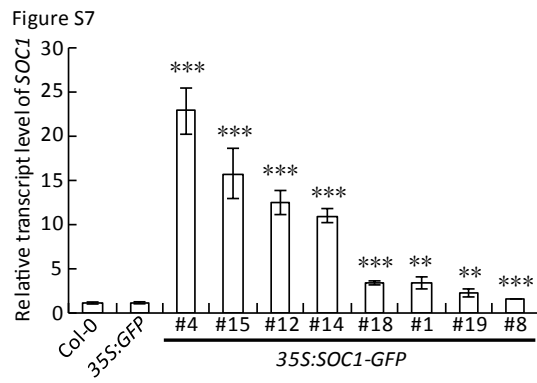

**Figure S7 Relative transcript levels of *SOC1* in *35S:SOC1-GFP* transgenic lines (T3)**

*SOC1* transcript levels in Col-0 and *35S:GFP* plants were used as controls. Data are means  $\pm$  SD of 2 biological repeats. \*\*  $P < 0.01$ , \*\*\*  $P < 0.001$  (t-tests).

Figure S8

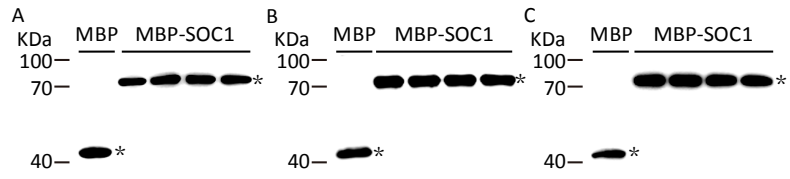

**Figure S8 Western immunoblot analysis of the purified MBP and MBP-SOC1 proteins**

The proteins were detected with anti-MBP antibodies, and the amounts of each protein loaded for the EMSA shown in Figure 2D (A, *PPH*) and Figure 5D (B, *NYE1*; C, *SAG113*) were the same as those for Western blot assay.

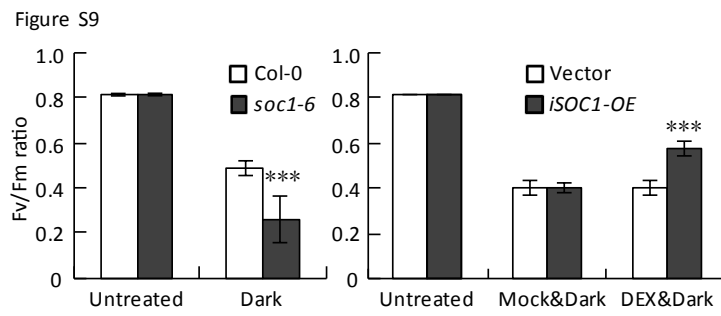

**Figure S9 Fv/Fm ratios of the detached 5<sup>th</sup> and 6<sup>th</sup> rosette leaves of 3-week-old *soc1-6* and *iSOC1-OE* plants during dark treatment**

Detached 5<sup>th</sup> and 6<sup>th</sup> rosette leaves of *soc1-6* and WT plants were treated in darkness for 5 days, whereas those of *iSOC1-OE* and the vector control plants treated for 6 days. Mock, water; DEX, 30  $\mu$ M dexamethasone water solution; vector, empty vector control. Data are means  $\pm$  SD of 3 biological repeats. \*\*\* P < 0.001 (t-tests).

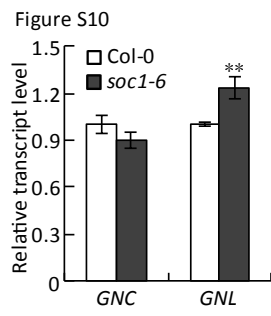

**Figure S10 Relative transcript levels of *GNC* and *GNL* in the 5<sup>th</sup> and 6<sup>th</sup> rosette leaves of 3-week-old *soc1-6* plants**

Data are means  $\pm$  SD of 2 biological repeats. \*\* P < 0.01 (t-tests).

Figure S11

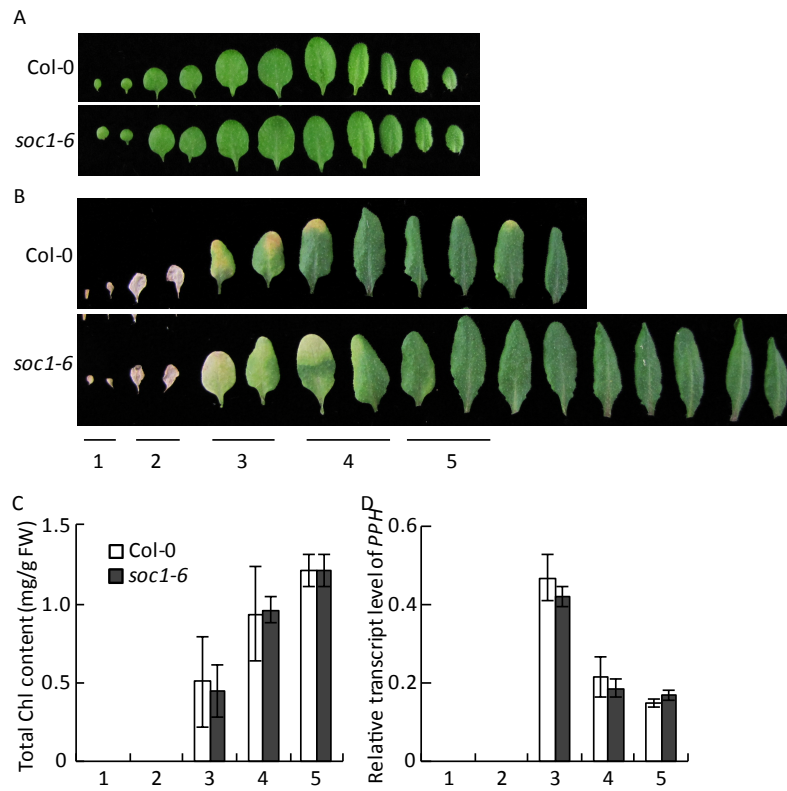

**Figure S11 Developmental senescence phenotypes of *soc1-6* leaves**

**A** and **B**, Phenotypes of all the rosette leaves of 3-week-old and 6-week-old plants, respectively.  
**C**, Chl contents of the indicated leaves shown in **B**.  
**D**, Relative transcript levels of *PPH* in the indicated leaves shown in **B**.  
In **C** and **D**, data are means  $\pm$  SD of 2 biological repeats.

Figure S12

A

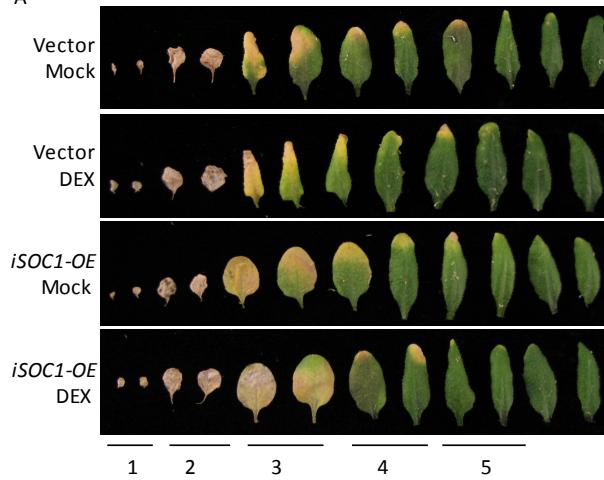

B

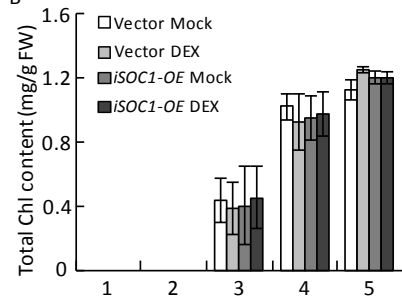

C

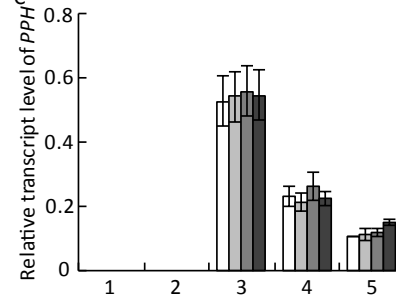

**Figure S12 Developmental senescence phenotypes of *iSOC1-OE* leaves**

**A**, Phenotypes of all the rosette leaves of 6-week-old plants. Three-week-old plants were sprayed with DEX every 5 days. Mock, water; DEX, 30  $\mu$ M dexamethasone water solution; vector, empty vector control.

**B**, Chl contents in the indicated leaves shown in **A**.

**C**, Relative transcript levels of *PPH* in the indicated leaves shown in **A**.

In **B** and **C**, data are means  $\pm$  SD of 2 biological repeats.
