# Supplementary material
Source: PubMed Central journal article supplement (PMC5338665)
Supplement: supp_pp.16.01457_PP2016-01457DR1_Supplemental_Materialtbl1.pdf [file supp_pp.16.01457_PP2016-01457DR1_Supplemental_Materialtbl1.pdf]

Table S1 (1) Up-regulated in dark-induced and natural senescence (796 genes)

| Gene ID   | Gene Description                                                                                           |
|-----------|------------------------------------------------------------------------------------------------------------|
| At1g01480 | 1-aminocyclopropane-1-carboxylate synthase 2 / ACC synthase 2 (AtACS2/AtACC1)                              |
| At1g01560 | putative kinase, MAPK subfamily (AtMPK11)                                                                  |
| At1g01720 | no apical meristem (NAM) family protein                                                                    |
| At1g01730 | expressed protein                                                                                          |
| At1g02310 | glycosyl hydrolase family protein 5 / cellulase family protein / (1-4)-beta-mannan endohydrolase, putative |
| At1g02360 | chitinase, putative                                                                                        |
| At1g02390 | phospholipid/glycerol acyltransferase family                                                               |
| At1g02470 | expressed protein                                                                                          |
| At1g02660 | lipase (class 3) family                                                                                    |
| At1g02816 | expressed protein                                                                                          |
| At1g02860 | SPX (SYG1/Pho81/XPR1) domain-containing protein / zinc finger (C3HC4-type RING finger) protein-related     |
| At1g02920 | glutathione S-transferase, putative                                                                        |
| At1g02930 | glutathione S-transferase, putative                                                                        |
| At1g03080 | kinase interacting family protein                                                                          |
| At1g03220 | extracellular dermal glycoprotein, putative / EDGP, putative                                               |
| At1g03850 | glutaredoxin family protein                                                                                |
| At1g04960 | expressed protein                                                                                          |
| At1g04970 | lipid-binding serum glycoprotein family protein                                                            |
| At1g05340 | expressed protein                                                                                          |
| At1g05560 | UDP-glucose transferase (AtUGT1)                                                                           |
| At1g05680 | UDP-glucuronosyl/UDP-glucosyl transferase family protein                                                   |
| At1g05710 | ethylene-responsive protein, putative                                                                      |
| At1g06520 | phospholipid/glycerol acyltransferase family                                                               |
| At1g06570 | 4-hydroxyphenylpyruvate dioxygenase (HPD)                                                                  |
| At1g07040 | expressed protein                                                                                          |
| At1g07400 | 17.8 kDa class I heat shock protein (HSP17.8-CI)                                                           |
| At1g07600 | metallothionein-like protein                                                                               |
| At1g07670 | putative Ca <sup>2+</sup> -transporting P2A-type ATPase (AtECA4)                                           |
| At1g07810 | Ca <sup>2+</sup> /Mn <sup>2+</sup> -transporting P2A-type ATPase (AtECA1/AtACA3)                           |
| At1g08230 | amino acid transporter family                                                                              |

At1g08320 bZIP family transcription factor  
At1g08920 sugar transporter, putative  
At1g08940 phosphoglycerate/bisphosphoglycerate mutase family protein  
At1g09240 nicotianamine synthase, putative  
At1g09480 cinnamyl-alcohol dehydrogenase family / CAD family  
At1g09500 cinnamyl-alcohol dehydrogenase family / CAD family (AtSAG26)  
At1g09560 germin-like protein (GLP4) (GLP5)  
At1g09740 ethylene-responsive protein, putative  
At1g09940 glutamyl-tRNA reductase 2 / GluTR (HEMA2)  
At1g10070 branched-chain amino acid aminotransferase 2 / branched-chain amino acid transaminase 2 (BCAT2)  
At1g10140 expressed protein (AtSAG103)  
At1g10410 expressed protein  
At1g11190 bifunctional nuclease (AtBFN1)  
At1g11925 stigma-specific Stig1 family protein  
At1g12200 flavin-containing monooxygenase family protein / FMO family protein  
At1g13340 expressed protein  
At1g13520 expressed protein  
At1g13990 expressed protein  
At1g14330 kelch repeat-containing F-box family protein  
At1g14870 putative plant cadmium resistance protein (AtPCR2)  
At1g15380 lactoylglutathione lyase family protein / glyoxalase I family protein  
At1g15430 expressed protein  
At1g15670 kelch repeat-containing F-box family protein  
At1g17020 oxidoreductase, 2OG-Fe(II) oxygenase family protein  
At1g17030 expressed protein  
At1g17170 glutathione S-transferase, putative  
At1g17745 D-3-phosphoglycerate dehydrogenase / 3-PGDH  
At1g17860 trypsin and protease inhibitor family protein / Kunitz family protein  
At1g18860 WRKY family transcription factor (AtWRKY61)  
At1g19020 expressed protein  
At1g19180 expressed protein  
At1g19850 auxin response factor, transcription factor MONOPTEROS (AtARF5/AtMP/AtIAA24)  
At1g20180 At14a-related protein

At1g20620 catalase 3 (SEN2)  
At1g21000 zinc-binding family protein  
At1g21310 proline-rich extensin-like family protein  
2-oxoisovalerate dehydrogenase, putative / 3-methyl-2-oxobutanoate dehydrogenase, putative / branched-chain alpha-keto acid dehydrogenase E1 alpha subunit, putative  
At1g21400  
At1g21410 F-box family protein  
At1g21550 calcium-binding protein, putative  
At1g21920 phosphatidylinositol-4-phosphate 5-kinase-related  
At1g22360 UDP-glucuronosyl/UDP-glucosyl transferase family protein  
At1g22400 putative trans-zeatin-O- $\beta$ -D-glycosyltransferase / cytokinin-O-glucoside synthesis UGT85A1  
At1g22930 T-complex protein 11  
At1g23040 extensin related protein  
At1g23120 major latex protein-related / MLP-related  
At1g23440 pyrrolidone-carboxylate peptidase family protein  
At1g23550 expressed protein  
At1g23710 expressed protein  
At1g23870 glycosyl transferase family 20 protein / trehalose-phosphatase family protein  
At1g25400 expressed protein  
At1g26380 FAD-binding domain-containing protein  
At1g26390 FAD-binding domain-containing protein  
At1g26400 FAD-binding domain-containing protein  
At1g26420 FAD-binding domain-containing protein  
At1g26930 kelch repeat-containing F-box family protein  
At1g27020 expressed protein  
At1g27300 expressed protein  
At1g27760 interferon-related developmental regulator family protein / IFRD protein family  
At1g27980 pyridoxal-dependent decarboxylase family  
At1g28130 auxin-responsive GH3 family protein / IAA-amino acid synthase (AtGH3.17)  
At1g28190 expressed protein  
At1g28480 glutaredoxin family protein  
At1g28600 lipase, putative  
At1g29050 expressed protein  
At1g29640 expressed protein

At1g29800 zinc finger (FYVE type) family protein  
At1g30040 gibberellin 2-beta-dioxygenase / GA2-oxidase (AtGA2OX2)  
At1g30700 FAD-binding domain-containing protein  
At1g31120 putative potassium transporter (AtKUP10/AtHAK10/AtKT10)  
At1g31480 protein involved in shoot gravitropism (AtSGR2)  
At1g31820 putative neutral amino acid transport protein (AtLAT3)  
At1g32350 alternative oxidase, putative  
At1g32450 proton-dependent oligopeptide transport (POT) protein family  
At1g32460 expressed protein  
At1g32740 expressed protein  
At1g32920 expressed protein  
At1g33720 cytochrome P450 monooxygenase  
At1g34060 alliinase family protein  
At1g35190 oxidoreductase, 2OG-Fe(II) oxygenase family protein  
At1g35910 trehalose-6-phosphate phosphatase, putative  
At1g44770 expressed protein  
At1g44800 nodulin MtN21 family protein  
At1g45145 thioredoxin H-type 5 (TRX-H-5) (TOUL)  
At1g45150 expressed protein  
At1g47128 cysteine proteinase (RD21A) / thiol protease  
At1g47890 disease resistance like protein  
At1g48000 myb family transcription factor  
At1g48260 putative SNF1-related protein kinase 2, SnRK2 (AtSnRK3.21/AtPKS20)  
At1g48490 protein kinase family protein, PvPK/NPH1/S6K subfamily  
At1g49470 expressed protein  
At1g51760 IAA-amino acid amidohydrolase 3 / IAA-Ala hydrolase 3 (AtIAR3)  
At1g51790 putative receptor-like kinase RLK/Pelle, LRR-Ia subfamily  
At1g51800 putative receptor-like kinase RLK/Pelle, LRR-Ia subfamily  
At1g51890 putative receptor-like kinase RLK/Pelle, LRR-Ia subfamily  
At1g52200 expressed protein  
At1g52890 no apical meristem (NAM) family protein  
At1g53560 expressed protein  
At1g53580 hydroxyacylglutathione hydrolase, putative / glyoxalase II, putative

At1g54100 aldehyde dehydrogenase, putative / antiquitin, putative  
At1g54460 expressed protein  
At1g54570 esterase/lipase/thioesterase family protein  
At1g54890 late embryogenesis abundant protein-related / LEA protein-related  
At1g55020 lipoxygenase (AtLOX1)  
At1g55850 cellulose synthase family  
At1g55920 serine O-acetyltransferase, putative  
At1g56010 transcription activator NAC1 (NAC1)  
At1g57630 disease resistance protein (TIR class), putative  
At1g57990 putative purine permease (AtPUP18)  
At1g58180 carbonic anhydrase family protein / carbonate dehydratase family protein  
At1g58200 mechanosensitive (MS) ion channel domain protein  
At1g58340 putative MATE-related efflux carrier (AtDTX48)  
At1g58360 amino acid permease 1 (AtAAP1/AtNAT2)  
At1g59660 nucleoporin family protein  
At1g59820 putative aminophospholipid translocase, P4-type ATPase (AtALA3)  
At1g60730 aldo/keto reductase family protein  
At1g60960 putative iron Fe(II) transporter (AtIRT3)  
At1g61140 SNF2 domain-containing protein / helicase domain-containing protein / zinc finger protein-related  
At1g61560 seven transmembrane MLO protein (AtMLO6)  
At1g61800 glucose-6-phosphate/phosphate translocator (AtGPT2)  
At1g61820 glycosyl hydrolase family 1 protein  
At1g62200 putative oligopeptide transporter (-)  
At1g62300 WRKY family transcription factor (AtWRKY6)  
At1g62370 zinc finger (C3HC4-type RING finger) family protein  
At1g62570 flavin-containing monooxygenase family protein / FMO family protein  
At1g62660 glycosyl hydrolase family 32  
At1g62763 hypothetical protein  
At1g63180 UDP-glucose 4-epimerase, putative / UDP-galactose 4-epimerase, putative / Galactowaldenase, putative  
At1g63720 expressed protein  
At1g63840 putative RING zinc finger protein  
At1g64610 WD-40 repeat family protein  
At1g64950 cytochrome P450, putative

At1g65520 enoyl-CoA hydratase/isomerase family protein  
At1g65690 harpin-induced protein-related / HIN1-related / harpin-responsive protein-related  
At1g65840 amine oxidase family protein  
At1g65970 peroxiredoxin type 2, putative  
At1g66090 disease resistance protein (TIR-NBS class), putative  
At1g66160 U-box domain-containing protein  
At1g66400 calmodulin-related protein, putative  
At1g66580 60S ribosomal protein L10 (AtRPL10C/AtSAG24)  
At1g67070 phosphomannose isomerase, putative (DIN9)  
At1g67360 rubber elongation factor (REF) family protein  
At1g67810 Fe-S metabolism associated domain-containing protein  
At1g67980 caffeoyl-CoA 3-O-methyltransferase, putative  
At1g68140 expressed protein  
At1g68440 expressed protein  
At1g68620 expressed protein  
At1g68820 putative RING-domain protein  
At1g69270 putative receptor-like kinase RLK/Pelle, LRR-XV subfamily (AtRPK1)  
At1g69490 no apical meristem (NAM) family protein  
At1g69570 Dof-type zinc finger domain-containing protein  
At1g69890 expressed protein  
At1g69930 glutathione S-transferase, putative  
At1g70300 putative potassium transporter (AtKUP6/AtHAK6/AtKT6)  
At1g70680 Ca<sup>2+</sup>-binding EF-hand common family protein, putative  
At1g70690 kinase-related  
At1g70810 C2 domain-containing protein  
At1g71910 expressed protein  
At1g71960 putative white-brown complex homolog, ABC transporter (AtWBC26)  
At1g72120 proton-dependent oligopeptide transport (POT) protein family  
At1g72680 cinnamyl-alcohol dehydrogenase, putative  
At1g72700 putative aminophospholipid translocase, P4-type ATPase (AtALA5)  
At1g72800 nuM1-related  
At1g73010 expressed protein  
At1g73040 jacalin lectin family protein

At1g73260 trypsin and protease inhibitor family protein / Kunitz family protein  
At1g73680 pathogen-responsive alpha-dioxygenase, putative  
At1g73810 expressed protein  
At1g74010 strictosidine synthase family protein  
At1g74020 strictosidine synthase family protein  
At1g74360 putative receptor-like kinase RLK/Pelle, LRR-Xb subfamily  
At1g74590 glutathione S-transferase, putative  
At1g75390 bZIP transcription factor family protein  
At1g76070 expressed protein  
At1g76390 armadillo/beta-catenin repeat family protein / U-box domain-containing protein  
At1g76600 expressed protein  
At1g76930 proline-rich extensin-like family protein / OBP3-responsive gene 5 (AtORG5/AtEXT1)  
At1g77000 F-box family protein  
At1g77370 glutaredoxin, putative  
At1g77770 expressed protein  
At1g77900 unknown protein  
At1g77920 bZIP family transcription factor  
At1g78280 transcription factor jumonji (jmjC) domain-containing protein  
At1g78290 putative kinase, SnRK2 subfamily (AtSnRK2.8)  
At1g78780 pathogenesis-related family protein  
At1g79270 expressed protein  
At1g79680 putative receptor-like kinase RLK/Pelle, WAK subfamily (AtWAKL10)  
At1g79900 mitochondrial arginine-ornithine translocator (AtmBAC2)  
At1g80120 expressed protein  
At1g80160 lactoylglutathione lyase family protein / glyoxalase I family protein  
At1g80300 plastidic ATP/ADP transporter 1 (AtAATP1/AtNTT1)  
At2g01540 C2 domain-containing protein  
At2g01890 purple acid phosphatase, putative  
At2g02390 glutathione S-transferase zeta 1 (GSTZ1) (GST18)  
At2g02710 PAC motif-containing protein  
At2g02870 kelch repeat-containing F-box family protein  
At2g03270 DNA-binding protein, putative  
At2g03760 steroid sulfotransferase, putative

At2g03850 late embryogenesis abundant domain-containing protein / LEA domain-containing protein  
At2g05260 lipase class 3 family protein  
At2g05540 glycine-rich protein  
At2g15220 secretory protein, putative  
At2g15310 ADP-ribosylation factor, putative  
At2g16700 actin-depolymerizing factor 5 (ADF5)  
At2g16790 shikimate kinase family protein  
At2g17720 2-oxoglutarate-dependent dioxygenase family  
At2g18050 histone H1-3 (HIS1-3)  
At2g18690 expressed protein  
At2g18700 glycosyl transferase family 20 protein / trehalose-phosphatase family protein  
At2g18950 putative homogentisate phytylprenyltransferase (tocopherol phytyltransferase) (AtHPT)  
At2g19190 putative receptor-like kinase RLK/Pelle, LRR-Ia subfamily, FLG22/senescence-induced (AtSIRK/AtFRK1)  
At2g19570 cytidine deaminase (CDD) / cytidine aminohydrolase  
At2g19800 expressed protein  
At2g19880 ceramide glucosyltransferase, putative  
At2g20010 expressed protein  
At2g20920 expressed protein  
At2g21180 expressed protein  
At2g21190 ER lumen protein retaining receptor family  
At2g21560 expressed protein  
At2g22470 arabinogalactan protein (AtAGP2)  
At2g23150 multispecific vacuolar metal transporter (AtNRAMP3)  
At2g23450 putative receptor-like kinase RLK/Pelle, WAK/LRK10L-1 subfamily (AtWAKL14)  
At2g23790 expressed protein  
At2g24180 cytochrome P450 family protein  
At2g25450 2-oxoglutarate-dependent dioxygenase, putative  
At2g25460 expressed protein  
At2g25625 auxin-regulated protein  
At2g26170 thromboxane-A synthase(cytochrome p450 family), putative  
At2g26310 expressed protein  
At2g26560 patatin, putative  
At2g26670 heme oxygenase 1 (HO1) (HY1)

At2g26830 choline/ethanolamine kinase family protein  
At2g27150 aldehyde oxidase 3 (AtAAO3)  
At2g27500 glycosyl hydrolase family 17  
At2g27580 zinc finger (AN1-like) family protein  
At2g28110 exostosin family protein  
At2g28120 nodulin family  
At2g28200 zinc finger (C2H2 type) family protein  
At2g28400 expressed protein  
At2g28710 zinc finger (C2H2 type) family protein  
At2g29420 glutathione S-transferase, putative  
At2g29460 glutathione S-transferase, putative  
At2g29470 glutathione S-transferase, putative  
At2g30140 UDP-glucuronosyl/UDP-glucosyl transferase family protein  
At2g30250 WRKY family transcription factor (AtWRKY25)  
At2g30360 putative SNF1-related protein kinase 2, SnRK2 (AtSnRK3.22/AtCIPK11/AtPKS5)  
At2g30550 lipase class 3 family protein  
At2g30750 cytochrome P450 71A12, putative (CYP71A12)  
At2g31260 autophagy 9 (AtAPG9/AtATG9)  
At2g31390 pfkB-type carbohydrate kinase family protein  
At2g31570 glutathione peroxidase, putative  
At2g32150 haloacid dehalogenase-like hydrolase family protein  
At2g32190 expressed protein  
At2g32240 putative myosin heavy chain  
At2g32660 disease resistance like protein  
At2g33150 putative 3-ketoacyl-CoA thiolase (AtPED1)  
At2g33380 RD20 protein  
At2g33480 no apical meristem (NAM) family protein  
At2g34810 FAD-binding domain-containing protein  
At2g35060 putative potassium transporter (AtKUP11/AtHAK11/AtKT11)  
At2g35070 expressed protein  
At2g35940 homeodomain-containing protein  
At2g35980 similar to harpin-induced protein hin1 from tobacco  
At2g36950 heavy-metal-associated domain-containing protein

At2g37130 peroxidase 21 (PER21) (P21) (PRXR5)  
At2g37750 expressed protein  
At2g37760 aldo/keto reductase family protein  
At2g38240 oxidoreductase, 2OG-Fe(II) oxygenase family protein  
At2g38340 AP2 domain-containing transcription factor, putative (DRE2B)  
At2g38410 VHS domain-containing protein / GAT domain-containing protein  
At2g38860 protease1 (pfpl)-like protein (YLS5)  
At2g38870 protease inhibitor, putative  
At2g39200 seven transmembrane MLO protein (AtMLO12)  
At2g39210 nodulin family  
At2g39360 putative receptor-like kinase RLK/Pelle, CrRLK1L-1 subfamily  
At2g39420 esterase/lipase/thioesterase family protein  
At2g39440 expressed protein  
At2g39710 aspartyl protease family protein  
At2g39970 36kDa-peroxisomal membrane protein (AtPMP36)  
At2g41110 calmodulin-2/3/5 (CAM2) (CAL1)  
At2g41380 embryo-abundant protein-related  
At2g41850 endo-polygalacturonase, putative  
At2g42010 phospholipase D beta 1 / PLD beta 1 (PLDBETA1)  
At2g42280 basic helix-loop-helix (bHLH) family protein  
At2g42360 putative RING-domain protein  
At2g42790 citrate synthase, glyoxysomal, putative  
At2g42890 RNA recognition motif (RRM)-containing protein  
At2g43060 expressed protein  
At2g43080 oxidoreductase, 2OG-Fe(II) oxygenase family protein  
At2g43510 trypsin inhibitor, putative  
At2g43520 trypsin inhibitor, putative  
At2g43570 chitinase, putative  
At2g43820 UDP-glucuronosyl/UDP-glucosyl transferase family protein  
At2g44500 expressed protein  
At2g45170 autophagy 8e (AtAPG8e/AtATG8e)  
At2g45210 auxin-responsive protein-related  
At2g45220 pectinesterase family protein

At2g45570 cytochrome P450 76C2, putative (AtCYP76C2/AtYLS6)  
At2g46500 phosphatidylinositol 3- and 4-kinase family protein / ubiquitin family protein  
At2g46680 homeobox-leucine zipper protein 7 / HD-ZIP transcription factor 7 (AtHB7)  
At2g47000 putative multidrug-resistance protein, P-glycoprotein (AtPGP4)  
At2g47190 MYB transcription factor (Atmyb2)  
At2g47550 pectinesterase family  
At3g01080 WRKY family transcription factor (AtWRKY58)  
At3g01290 band 7 family protein  
At3g01420 pathogen-responsive fatty acid alpha-dioxygenase 1 (AtalphaDOX1)  
At3g01470 homeobox-leucine zipper protein 5 (HAT5) / HD-ZIP protein 5 / HD-ZIP protein (HB-1)  
At3g01970 WRKY family transcription factor (AtWRKY45)  
At3g02040 glycerophosphoryl diester phosphodiesterase family protein  
At3g02140 expressed protein  
At3g02150 TCP family transcription factor, putative  
At3g02290 zinc finger (C3HC4-type RING finger) family protein  
At3g02875 IAA-amino acid amidohydrolase 1 (AtILR1)  
At3g03310 lecithin:cholesterol acyltransferase family protein / LACT family protein  
At3g03470 cytochrome P450, putative  
At3g03610 phagocytosis and cell motility protein ELMO1-related  
At3g03870 expressed protein  
At3g04060 no apical meristem (NAM) family protein  
At3g04070 no apical meristem (NAM) family protein  
At3g04350 expressed protein  
At3g04520 threonine aldolase family protein  
At3g04720 hevein-like protein (HEL)  
At3g05165 sugar transporter, putative  
At3g05400 sugar transporter, putative  
At3g05630 phospholipase D, putative (PLDP2)  
At3g05970 long-chain-fatty-acid--CoA ligase / long-chain acyl-CoA synthetase (LACS6)  
At3g06420 autophagy 8h (AtATG8h/AtAPG8h)  
At3g06780 glycine-rich protein  
At3g06810 acyl-CoA dehydrogenase-related  
At3g06860 fatty acid beta-oxidation multifunctional protein (AtMFP2)

At3g07700 ABC1 family protein  
At3g08720 protein kinase family protein, PvPK/NPH1/S6K subfamily  
At3g08860 alanine--glyoxylate aminotransferase, putative / beta-alanine-pyruvate aminotransferase, putative / AGT, putative  
At3g09270 glutathione S-transferase, putative  
At3g10320 expressed protein  
At3g10450 serine carboxypeptidase S10 family protein  
At3g10500 NAC domain / no apical meristem (NAM) protein, putative  
At3g10640 SNF7 family protein  
At3g10980 senescence-associated gene product, wound-induced (AtSAG20/AtWI12)  
At3g11330 leucine-rich repeat family protein  
At3g11780 MD-2-related lipid recognition domain-containing protein / ML domain-containing protein  
At3g12500 basic endochitinase  
At3g12580 heat shock protein 70, putative / HSP70, putative  
At3g12740 membrane protein common family  
At3g12830 auxin-responsive family protein  
At3g13380 brassinosteroid receptor, receptor-like kinase RLK/Pelle, LRR-Xb subfamily (AtBRL3)  
At3g13430 zinc finger (C3HC4-type RING finger) family protein  
At3g13672 seven in absentia (SINA) family protein  
At3g13790 beta-fructosidase (BFRUCT1) / beta-fructofuranosidase / cell wall invertase  
At3g13950 expressed protein  
At3g14050 RelA/SpoT protein, putative (RSH2)  
At3g14270 phosphatidylinositol-4-phosphate 5-kinase family protein  
At3g14280 expressed protein  
At3g14770 nodulin MtN3 family protein  
At3g14990 4-methyl-5(b-hydroxyethyl)-thiazole monophosphate biosynthesis protein, putative  
At3g15500 no apical meristem (NAM) family protein (AtNAC3)  
At3g16150 L-asparaginase, putative / L-asparagine amidohydrolase, putative  
At3g17000 ubiquitin-conjugating enzyme, putative  
At3g17770 dihydroxyacetone kinase family protein  
At3g17790 acid phosphatase type 5 (ACP5)  
At3g17810 dihydroorotate dehydrogenase family protein / dihydroorotate oxidase family protein  
At3g17820 glutamine synthetase (GS1)  
At3g18950 transducin / WD-40 repeat protein family

At3g19260 longevity-assurance protein (LAG1) family  
At3g19580 zinc finger (C2H2 type) protein 2 (AZF2)  
At3g19900 expressed protein  
At3g19910 zinc finger (C3HC4-type RING finger) family protein  
At3g19970 expressed protein  
At3g20250 pumilio/Puf RNA-binding domain-containing protein  
At3g20500 calcineurin-like phosphoesterase family protein  
At3g21080 ABC transporter-related  
At3g21500 1-deoxy-D-xylulose 5-phosphate synthase, putative / 1-deoxyxylulose-5-phosphate synthase, putative / DXP-synthase, putative  
At3g21520 expressed protein  
At3g21610 expressed protein  
At3g21690 putative MATE-related efflux carrier (AtDTX40)  
At3g21790 UDP-glucuronosyl/UDP-glucosyl transferase family protein  
At3g22160 VQ motif-containing protein  
At3g22260 OTU-like cysteine protease family protein  
At3g22370 alternative oxidase 1a precursor (AtAOX1a/AtHSR3)  
At3g22460 cysteine synthase, putative / O-acetylserine (thiol)-lyase, putative / O-acetylserine sulfhydrylase, putative  
At3g22560 GCN5-related N-acetyltransferase (GNAT) family protein  
At3g22600 protease inhibitor/seed storage/lipid transfer protein (LTP) family protein  
At3g22740 homocysteine S-methyltransferase 3 (HMT-3)  
At3g22750 putative kinase, Raf subfamily, putative MAP kinase kinase kinase, MAPKKK  
At3g22910 putative Ca<sup>2+</sup>-transporting P2B-type ATPase (AtACA13)  
At3g23790 AMP-binding protein, putative  
At3g23920 beta-amylase, putative / 1,4-alpha-D-glucan maltohydrolase, putative  
At3g24500 ethylene-responsive transcriptional coactivator, putative  
At3g24530 AAA-type ATPase family protein / ankyrin repeat family protein  
At3g25870 expressed protein  
At3g26100 regulator of chromosome condensation (RCC1) family protein  
At3g26170 cytochrome P450 71B19  
At3g26180 cytochrome P450 71B20  
At3g26210 cytochrome P450 71B23, putative (CYP71B23)  
At3g26220 cytochrome P450 family  
At3g26440 expressed protein

At3g26580 expressed protein  
At3g26840 esterase/lipase/thioesterase family protein  
At3g28210 zinc finger (AN1-like) family protein  
At3g29250 short-chain dehydrogenase/reductase (SDR) family protein  
At3g29575 expressed protein  
At3g30775 proline oxidase, mitochondrial / osmotic stress-responsive proline dehydrogenase (AtPOX/AtPRO1/AtERD5)  
At3g43230 zinc finger (FYVE type) family protein  
At3g44300 nitrilase 2 (AtNIT2)  
At3g44320 nitrilase 3 (AtNIT3)  
At3g44880 maize lethal leaf-spot 1 homolog, accelerated cell death 1 (AtLLS1/AtACD1)  
At3g45300 isovaleryl-CoA-dehydrogenase (IVD)  
At3g45730 expressed protein  
At3g46080 zinc finger (C2H2 type) family protein  
At3g46690 UDP-glucuronosyl/UDP-glucosyl transferase family protein  
At3g48580 xyloglucan:xyloglucosyl transferase, putative / xyloglucan endotransglycosylase, putative / endo-xyloglucan transferase, putative  
At3g48780 serine C-palmitoyltransferase, putative  
At3g49120 peroxidase, putative  
At3g49210 expressed protein  
At3g49780 phytosulfokines 3 (PSK3)  
At3g50260 AP2 domain-containing transcription factor, putative  
At3g50480 broad-spectrum mildew resistance RPW8 family protein  
At3g50770 calmodulin-related protein, putative  
At3g50910 expressed protein  
At3g51000 epoxide hydrolase, putative  
At3g51090 expressed protein  
At3g51130 expressed protein  
At3g51250 senescence/dehydration-associated protein-related  
At3g51430 strictosidine synthase, putative (AtYLS2)  
At3g51440 strictosidine synthase family protein  
At3g51660 macrophage migration inhibitory factor family protein / MIF family protein  
At3g51730 saposin B domain-containing protein  
At3g51840 short-chain acyl-CoA oxidase (AtACX4)  
At3g51860 Ca<sup>2+</sup>/H<sup>+</sup> antiporter/cation exchanger, CaCA subfamily (AtCAX3/AtHCX)

At3g52450 U-box domain-containing protein  
At3g52780 purple acid phosphatase (PAP20)  
At3g53120 expressed protein  
At3g53620 inorganic pyrophosphatase, putative (soluble) / pyrophosphate phospho-hydrolase, putative / PPase, putative  
At3g54150 embryo-abundant protein-related  
At3g54620 bZIP transcription factor family protein  
At3g54640 tryptophan synthase, alpha subunit (AtTSA1(AtTRP3))  
At3g54680 proteophosphoglycan-related  
At3g54950 patatin-related  
At3g55270 MAP kinase phosphatase (MKP1)  
At3g55430 glycosyl hydrolase family 17 protein / beta-1,3-glucanase, putative  
At3g55470 C2 domain-containing protein  
At3g55890 yippee family protein  
At3g55910 expressed protein  
At3g55970 oxidoreductase, 2OG-Fe(II) oxygenase family protein  
At3g56170 Ca(2+)-dependent nuclease  
At3g56200 amino acid transporter family  
At3g56310 alpha-galactosidase, putative / melibiase, putative / alpha-D-galactoside galactohydrolase, putative  
At3g57410 villin 3 (VLN3)  
At3g57520 alkaline alpha galactosidase, putative  
At3g57550 guanylate kinase 2 (GK-2)  
At3g58750 citrate synthase, glyoxysomal, putative  
At3g59210 F-box family protein  
At3g59700 putative receptor-like kinase RLK/Pelle, L-Lectin subfamily (AtLecRK1)  
At3g60130 glycosyl hydrolase family 1 protein / beta-glucosidase, putative (AtYLS1)  
At3g60140 glycosyl hydrolase family 1 protein  
At3g60180 uridylate kinase, putative / uridine monophosphate kinase, putative / UMP kinase, putative  
At3g60690 auxin-responsive family protein  
At3g61160 shaggy-related protein kinase beta / ASK-beta (ASK2)  
At3g61190 BON1-associated protein 1 (BAP1)  
At3g61890 homeobox-leucine zipper protein 12 (HB-12) / HD-ZIP transcription factor 12  
At3g61930 expressed protein  
At3g62420 bZIP transcription factor family protein

At3g62590 lipase (class 3) family  
At3g62770 autophagy 18a (AtATG18a)  
At3g63310 expressed protein  
At3g63380 putative Ca<sup>2+</sup>-transporting P2B-type ATPase (AtACA12)  
At4g01120 G-box binding factor 2 (GBF2)  
At4g01360 expressed protein  
At4g01430 nodulin MtN21 family protein  
At4g01610 cathepsin B-like cysteine protease, putative  
At4g01870 tolB protein-related  
At4g02280 sucrose synthase, putative / sucrose-UDP glucosyltransferase, putative  
At4g03320 chloroplast inner envelope translocon component (AtTic20-IV)  
At4g04460 aspartyl protease family protein  
At4g04490 putative receptor-like kinase RLK/Pelle, DUF26-1b subfamily (AtCRK36)  
At4g04620 autophagy 8b (AtATG8b/AtAPG8b)  
At4g08180 oxysterol-binding family protein  
At4g08230 glycine-rich protein  
At4g08290 nodulin MtN21 family protein  
At4g08300 nodulin MtN21 family protein  
At4g08770 peroxidase, putative  
At4g10960 UDP-glucose 4-epimerase, putative / UDP-galactose 4-epimerase, putative / Galactowaldenase, putative  
At4g11330 putative kinase, MAPK subfamily, MAP Kinase 5 (ATMPK5)  
At4g11650 osmotin-like protein (AtOSM34)  
At4g12080 DNA-binding protein family  
At4g12290 copper amine oxidase, putative  
At4g13030 expressed protein  
At4g13110 BSD domain-containing protein  
At4g13180 short-chain dehydrogenase/reductase (SDR) family protein  
At4g13250 short-chain dehydrogenase/reductase family protein  
At4g13530 expressed protein  
At4g14020 rapid alkalization factor (RALF) family protein  
At4g14630 germin-like protein (GLP9)  
At4g14950 expressed protein  
At4g15093 catalytic LigB subunit of aromatic ring-opening dioxygenase family

At4g15530 pyruvate,orthophosphate dikinase  
At4g15550 UDP-glucose:indole-3-acetate beta-D-glucosyltransferase (IAGLU)  
At4g15610 integral membrane protein family  
At4g15760 monooxygenase 1 (MO1), putative  
At4g16260 glycosyl hydrolase family 17 protein  
At4g16670 expressed protein  
At4g16690 esterase/lipase/thioesterase family protein  
At4g16760 long chain acyl-CoA oxidase (AtACX1)  
At4g16790 hydroxyproline-rich glycoprotein family  
At4g17030 expansin-related  
At4g17500 ERF/AP2 transcription factor, subfamily B-3, ethylene response factor 1 (AtERF1b)  
At4g18140 NLI interacting factor (NIF) family protein  
At4g18350 9-cis-epoxycarotenoid dioxygenase, putative (AtNCED2)  
At4g18430 Ras-related GTP-binding protein, putative  
At4g18580 expressed protein  
At4g18800 Ras-related GTP-binding family protein  
At4g18910 NOD26-like intrinsic protein (AtNIP1.2/AtNLM2)  
At4g18950 ankyrin protein kinase, putative  
At4g18980 expressed protein  
At4g19460 glycosyl transferase family 1 protein  
At4g19700 expressed protein  
At4g19810 glycosyl hydrolase family 18 protein  
At4g19860 lecithin:cholesterol acyltransferase family protein / LACT family protein  
At4g20110 spot 3 protein and vacuolar sorting receptor AtELP3  
At4g20260 DREPP plasma membrane polypeptide family protein  
At4g20860 FAD-binding domain-containing protein  
At4g21120 cationic amino acid transporter (AtCAT1/AtAAT1)  
At4g21160 zinc finger and C2 domain protein (ZAC)  
At4g21580 oxidoreductase, zinc-binding dehydrogenase family protein  
At4g21980 autophagy 8a (AtATG8a/AtAPG8a)  
At4g22590 trehalose-6-phosphate phosphatase, putative  
At4g22820 zinc finger (AN1-like) family protein  
At4g22920 expressed protein

At4g23680 major latex protein-related / MLP-related  
At4g23700 putative cation-proton exchanger, CPA2 subfamily (AtCHX17)  
At4g24040 glycosyl hydrolase family 37 (trehalase)  
At4g24120 putative Fe(III)-phytosiderophore uptake mediator (AtYSL1)  
At4g24230 acyl-CoA binding protein, putative / ACBP, putative  
At4g24380 expressed protein  
At4g24400 putative SNF1-related protein kinase 2, SnRK2 (AtSnRK3.13/AtCIPK8/AtPKS11)  
At4g24590 expressed protein  
At4g25000 alpha-amylase, putative / 1,4-alpha-D-glucan glucanohydrolase, putative  
At4g25030 expressed protein  
At4g25170 expressed protein  
At4g25390 putative receptor-like kinase RLK/Pelle, RLCK-XI subfamily  
At4g25690 expressed protein  
At4g25900 aldose 1-epimerase family protein  
At4g26470 calcium-binding EF-hand family protein  
At4g27260 auxin-responsive GH3 family protein / IAA-amino acid synthase (AtGH3.5)  
At4g27740 yippee family protein  
At4g28040 nodulin N21 family protein  
At4g28085 expressed protein  
At4g29380 protein kinase family protein / WD-40 repeat family protein  
At4g29950 microtubule-associated protein  
At4g30190 putative plasma membrane P3A-type H<sup>+</sup>-ATPase (AtAHA2)  
At4g30270 endo-xyloglucan transferase / xyloglucan endo-1,4-beta-D-glucanase (AtSEN4/AtMERI5)  
At4g30490 AFG1-like ATPase family protein  
At4g30790 expressed protein  
At4g31240 expressed protein  
At4g32250 protein kinase family  
At4g32480 expressed protein  
At4g32870 expressed protein  
At4g32940 vacuolar processing enzyme gamma / gamma-VPE  
At4g33150 lysine-ketoglutarate reductase/saccharopine dehydrogenase (AtLKR/AtSDH)  
At4g33565 similar to RING-H2 zinc finger protein ATL3, putative  
At4g33920 protein phosphatase 2C family protein / PP2C family protein

At4g34131 UDP-glucuronosyl/UDP-glucosyl transferase family protein  
At4g34135 UDP-glucuronosyl/UDP-glucosyl transferase family protein  
At4g34180 cyclase family protein  
At4g34230 cinnamyl-alcohol dehydrogenase, putative  
At4g34990 myb family transcription factor (MYB32)  
At4g35630 phosphoserine aminotransferase, chloroplast (PSAT)  
At4g35770 senescence-associated protein (ATSEN1)  
At4g36760 aminopeptidase P  
At4g36900 AP2 domain-containing protein RAP2.10 (RAP2.10)  
At4g36990 heat shock factor protein 4 (HSF4) / heat shock transcription factor 4 (HSTF4)  
At4g37010 caltractin, putative / centrin, putative  
At4g37150 esterase, putative  
At4g37310 cytochrome P450, putative  
At4g37320 cytochrome P450 family protein  
At4g37370 cytochrome P450, putative  
At4g37430 cytochrome P450 81F1 (AtCYP81F1/AtCYP91A2)  
At4g37520 peroxidase 50 (PER50) (P50) (PRXR2)  
At4g37530 peroxidase, putative  
At4g37610 TAZ zinc finger family protein / BTB/POZ domain-containing protein  
At4g37980 mannitol dehydrogenase, putative (ELI3-1)  
At4g37990 mannitol dehydrogenase, putative (ELI3-2)  
At4g38060 expressed protein  
At4g38540 monooxygenase 2 (MO2)  
At4g39140 expressed protein  
At4g39270 putative receptor-like kinase RLK/Pelle, LRR-XIV subfamily  
At4g39670 expressed protein  
At4g39950 cytochrome P450 monooxygenase (AtCYP79B2)  
At5g01220 UDP-sulfoquinovose:DAG sulfoquinovosyltransferase (sulfolipid synthase) (AtSQD2)  
At5g01380 expressed protein  
At5g01550 putative receptor-like kinase RLK/Pelle, L-Lectin subfamily  
At5g01800 saposin B domain-containing protein  
At5g01820 putative kinase, SnRK2/AMPK subfamily (AtSnRK3.15/AtCIPK14/AtSR1/AtPKS24)  
At5g02420 expressed protein

At5g02580 expressed protein  
At5g03380 heavy-metal-associated domain-containing protein  
At5g03560 expressed protein  
At5g03610 GDSL-motif lipase/hydrolase family protein  
At5g04040 patatin-related  
At5g04200 latex-abundant protein, putative (AMC9) / caspase family protein  
At5g04540 expressed protein  
At5g05110 cysteine protease inhibitor, putative / cystatin, putative  
At5g05410 DRE-binding protein (DREB2A)  
At5g05600 oxidoreductase, 2OG-Fe(II) oxygenase family protein  
At5g05730 anthranilate synthase, alpha subunit, component I-1 (ASA1)  
At5g06230 expressed protein  
At5g07100 WRKY family transcription factor (AtWRKY26)  
At5g07440 glutamate dehydrogenase 2 (GDH2)  
At5g07730 expressed protein  
At5g09440 phosphate-responsive protein, putative  
At5g10300 hydrolase, alpha/beta fold family  
At5g10650 zinc finger (C3HC4-type RING finger) family protein  
At5g10740 protein phosphatase 2C-related / PP2C-related  
At5g11260 bZIP protein HY5 (HY5)  
At5g11520 aspartate aminotransferase, chloroplast / transaminase A (AtASP3/AtYLS4)  
At5g11650 hydrolase, alpha/beta fold family  
At5g11950 expressed protein  
At5g12010 expressed protein  
At5g13080 WRKY family transcription factor (AtWRKY75)  
At5g13170 senescence-associated protein (AtSAG29)  
At5g13220 expressed protein  
At5g13320 auxin-responsive GH3 family protein  
At5g13550 putative plastidic proton/sulfate co-transporter (AtSultr4.1/AtAST82)  
At5g13750 transporter-like protein  
At5g13800 hydrolase, alpha/beta fold family protein  
At5g13820 telomeric DNA-binding protein 1 (TBP1)  
At5g14000 no apical meristem (NAM) family protein

|           |                                                                                 |
|-----------|---------------------------------------------------------------------------------|
| At5g14180 | lipase family protein                                                           |
| At5g14420 | copine-related                                                                  |
| At5g14730 | expressed protein                                                               |
| At5g15640 | putative mitochondrial carrier (-)                                              |
| At5g16360 | NC domain-containing protein                                                    |
| At5g16370 | AMP-binding protein, putative                                                   |
| At5g16910 | cellulose synthase family                                                       |
| At5g16970 | NADP-dependent oxidoreductase, putative (P1)                                    |
| At5g17280 | expressed protein                                                               |
| At5g17330 | glutamate decarboxylase 1 (GAD 1)                                               |
| At5g17380 | pyruvate decarboxylase family protein                                           |
| At5g17650 | glycine/proline-rich protein                                                    |
| At5g17760 | AAA-type ATPase family protein                                                  |
| At5g18270 | no apical meristem (NAM) family protein                                         |
| At5g18490 | expressed protein                                                               |
| At5g18630 | lipase class 3 family protein                                                   |
| At5g18640 | lipase class 3 family protein                                                   |
| At5g18670 | beta-amylase, putative (BMY3) / 1,4-alpha-D-glucan maltohydrolase, putative     |
| At5g18780 | F-box protein family                                                            |
| At5g18980 | expressed protein                                                               |
| At5g20000 | 26S proteasome AAA-ATPase subunit, putative                                     |
| At5g20230 | Phytocyanin, stellacyanin-like protein                                          |
| At5g20250 | raffinose synthase family protein / seed imbibition protein, putative (AtDIN10) |
| At5g20830 | sucrose synthase / sucrose-UDP glucosyltransferase (SUS1)                       |
| At5g20960 | indol-3-aldehyde oxidase 1 (AtAAO1)                                             |
| At5g21990 | tetratricopeptide repeat (TPR)-containing protein                               |
| At5g22300 | beta-cyano-L-alanine hydratase/nitrilase 4 (AtNIT4)                             |
| At5g22850 | protease-like protein                                                           |
| At5g23090 | TATA-binding protein-associated phosphoprotein Dr1 protein, putative (DR1)      |
| At5g23340 | expressed protein                                                               |
| At5g23660 | nodulin MtN3 family protein                                                     |
| At5g24160 | squalene monooxygenase 1,2 (squalene epoxidase 1,2) (SQP1,2)(SE1,2)             |
| At5g24530 | oxidoreductase, 2OG-Fe(II) oxygenase family protein                             |

At5g24870 RING finger-like protein  
At5g25110 putative SNF1-related protein kinase 2, SnRK2 (AtSnRK3.25/AtPKS25)  
At5g25560 zinc finger (C3HC4-type RING finger) family protein  
At5g25770 expressed protein  
At5g25820 exostosin family protein  
At5g25930 putative receptor-like kinase RLK/Pelle, LRR-XI subfamily  
At5g26340 putative monosaccharide-proton symporter (AtSTP13)  
At5g26940 exonuclease family protein  
At5g27350 putative MFS superfamily monosaccharide transporter (AtSFP1)  
At5g27420 putative RING-domain protein  
At5g27520 mitochondrial carrier protein family  
At5g33290 exostosin family protein  
At5g34930 arogenate dehydrogenase  
At5g35370 putative receptor-like kinase RLK/Pelle, S-domain-2b subfamily  
At5g37600 glutamine synthetase, putative  
At5g37960 oxidoreductase-related  
At5g38710 proline oxidase, putative / osmotic stress-responsive proline dehydrogenase, putative  
At5g38900 DSBA oxidoreductase family protein  
At5g39050 transferase family protein  
At5g39520 expressed protein  
At5g39610 no apical meristem (NAM) family protein  
At5g40240 nodulin MtN21 family protein  
At5g40690 expressed protein  
At5g40720 expressed protein  
At5g41080 glycerophosphoryl diester phosphodiesterase family protein  
At5g41800 amino acid transporter family  
At5g42010 WD-40 repeat family protein  
At5g42380 calmodulin-related protein, putative  
At5g43130 transcription initiation factor IID (TFIID) component TAF4 family protein  
At5g43580 protease inhibitor, putative  
At5g44360 FAD-binding domain-containing protein  
At5g44610 DREPP plasma membrane polypeptide-related  
At5g44790 putative Cu<sup>2+</sup>-transporting P1B-type ATPase (AtRAN1/AtHMA7)

At5g45380 high affinity urea/H<sup>+</sup> symporter (AtDUR3)  
At5g45410 expressed protein  
At5g45890 senescence-specific SAG12 protein / cysteine proteinase, putative (AtSAG12)  
At5g45900 autophagy 7 (AtATG7/AtAPG7)  
At5g46050 proton-dependent oligopeptide transport (POT) protein family  
At5g46180 ornithine aminotransferase, putative / ornithine--oxo-acid aminotransferase, putative  
At5g46760 basic helix-loop-helix (bHLH) family protein  
At5g46780 VQ motif-containing protein  
At5g47200 Ras-related GTP-binding protein, putative  
At5g47590 heat shock protein-related  
At5g47740 expressed protein  
At5g47860 expressed protein  
At5g48180 kelch repeat-containing protein  
At5g48400 glutamate receptor (AtGLR1.2)  
At5g48410 glutamate receptor (AtGLR1.3)  
At5g49360 glycosyl hydrolase family 3 protein  
At5g49450 bZIP family transcription factor  
At5g49480 sodium-inducible calcium-binding protein (ACP1) / sodium-responsive calcium-binding protein (ACP1)  
At5g49665 zinc finger (C3HC4-type RING finger) family protein  
At5g49690 UDP-glucuronosyl/UDP-glucosyl transferase family protein  
At5g49710 expressed protein  
At5g50200 expressed protein  
At5g50260 cysteine proteinase, putative  
At5g50380 exocyst subunit EXO70 family protein  
At5g51070 ATP-dependent Clp protease ATP-binding subunit (AtClpD/AtERD1)  
At5g51640 leaf senescence protein-related (AtYLS7 )  
At5g52070 agenet domain-containing protein  
At5g52450 putative MATE-related efflux carrier (AtDTX16)  
At5g52640 heat shock protein (AtHSP81-1/AtHSP83)  
At5g53970 aminotransferase, putative  
At5g54080 homogentisate 1,2-dioxygenase / homogentisicase/homogentisate oxygenase / homogentisic acid oxidase (HGO)  
At5g54240 expressed protein  
At5g54500 quinone reductase, putative

At5g54510 auxin-responsive GH3 family protein / IAA-amino acid synthase (AtGH3.6/AtDFL1)  
At5g54870 expressed protein  
At5g55970 putative RING-domain protein  
At5g56870 beta-galactosidase, putative / lactase, putative  
At5g56980 expressed protein  
At5g57220 cytochrome P450, putative  
At5g57480 AAA-type ATPase family protein  
At5g57655 xylose isomerase family protein  
At5g57900 SKP1/ASK1 interacting partner 1 (SKIP1) / SCF (Skp1-cullin-F-box) ubiquitin ligase  
At5g57910 expressed protein  
At5g58290 26S proteasome AAA-ATPase subunit (RPT3)  
At5g58350 protein kinase family protein, HsWNKL subfamily  
At5g59220 protein phosphatase 2C, putative / PP2C, putative  
At5g59420 oxysterol-binding family protein  
At5g59820 zinc finger (C2H2 type) family protein (ZAT12)  
At5g61820 expressed protein  
At5g61900 copine BONZAI1 (AtBON1)  
At5g62020 heat shock factor protein, putative (HSF6) / heat shock transcription factor, putative (HTSF6)  
At5g62150 peptidoglycan-binding LysM domain-containing protein  
At5g62680 proton-dependent oligopeptide transport (POT) protein family  
At5g62860 F-box family protein-related  
At5g63130 octicosapeptide/Phox/Bem1p (PB1) domain-containing protein  
At5g63850 amino acid permease 4 (AtAAP4)  
At5g63880 SNF7 family protein  
At5g63990 3(2),5-bisphosphate nucleotidase, putative / inositol polyphosphate 1-phosphatase, putative  
At5g64120 peroxidase, putative  
At5g64230 expressed protein  
At5g64310 arabinogalactan-protein (AGP1)  
At5g64370 beta-ureidopropionase, putative / beta-alanine synthase, putative  
At5g64430 octicosapeptide/Phox/Bem1p (PB1) domain-containing protein  
At5g64570 glycosyl hydrolase family 3 protein  
At5g65110 acyl-CoA oxidase (ACX2)  
At5g65210 bZIP family transcription factor (TGA1)

|           |                                                                                                               |
|-----------|---------------------------------------------------------------------------------------------------------------|
| At5g65300 | expressed protein                                                                                             |
| At5g66440 | expressed protein                                                                                             |
| At5g66760 | succinate dehydrogenase (ubiquinone) flavoprotein subunit, mitochondrial / flavoprotein subunit of complex II |
| At5g66930 | expressed protein                                                                                             |
| At5g67080 | protein kinase family protein, NtNPK1L subfamily                                                              |
| At5g67310 | cytochrome P450 family protein                                                                                |
| At5g67340 | armadillo/beta-catenin repeat family protein / U-box domain-containing protein                                |
| At5g67490 | expressed protein                                                                                             |

Table S1 (2) Co-expressed with PPH (MR&lt;500) (208 genes)

| Gene ID   | MR   | Gene Description                                                                                          |
|-----------|------|-----------------------------------------------------------------------------------------------------------|
| At5g13800 | 0    | hydrolase, alpha/beta fold family protein                                                                 |
| At3g44880 | 1.7  | maize lethal leaf-spot 1 homolog, accelerated cell death 1 (AtLLS1/AtACD1)                                |
| At5g51070 | 1.7  | ATP-dependent Clp protease ATP-binding subunit (AtClpD/AtERD1)                                            |
| At1g13990 | 2    | expressed protein                                                                                         |
| At4g22920 | 4.7  | expressed protein                                                                                         |
| At3g03470 | 4.9  | cytochrome P450, putative                                                                                 |
| At4g21580 | 7.1  | oxidoreductase, zinc-binding dehydrogenase family protein                                                 |
| At5g46180 | 7.3  | ornithine aminotransferase, putative / ornithine--oxo-acid aminotransferase, putative                     |
| At3g07700 | 7.3  | ABC1 family protein                                                                                       |
| At3g21790 | 11.5 | UDP-glucuronosyl/UDP-glucosyl transferase family protein                                                  |
| At2g20920 | 12   | expressed protein                                                                                         |
| At4g32250 | 17.1 | protein kinase family                                                                                     |
| At1g07040 | 18.6 | expressed protein                                                                                         |
| At5g57900 | 20.4 | SKP1/ASK1 interacting partner 1 (SKIP1) / SCF (Skp1-cullin-F-box) ubiquitin ligase                        |
| At5g05110 | 20.8 | cysteine protease inhibitor, putative / cystatin, putative                                                |
| At3g26580 | 21   | expressed protein                                                                                         |
| At3g19900 | 21.2 | expressed protein                                                                                         |
| At5g39520 | 21.5 | expressed protein                                                                                         |
| At1g54100 | 22.4 | aldehyde dehydrogenase, putative / antiquitin, putative                                                   |
| At1g45150 | 22.6 | expressed protein                                                                                         |
| At2g42790 | 23.9 | citrate synthase, glyoxysomal, putative                                                                   |
| At3g43230 | 26.3 | zinc finger (FYVE type) family protein                                                                    |
| At5g54080 | 26.6 | homogentisate 1,2-dioxygenase / homogentisicase/homogentisate oxygenase / homogentisic acid oxidase (HGO) |
| At1g22930 | 29.7 | T-complex protein 11                                                                                      |
| At2g26670 | 30.6 | heme oxygenase 1 (HO1) (HY1)                                                                              |
| At3g17000 | 31.8 | ubiquitin-conjugating enzyme, putative                                                                    |
| At2g25625 | 34.1 | auxin-regulated protein                                                                                   |
| At1g04960 | 34.5 | expressed protein                                                                                         |
| At2g33150 | 35.7 | putative 3-ketoacyl-CoA thiolase (AtPED1)                                                                 |
| At3g17810 | 37.5 | dihydroorotate dehydrogenase family protein / dihydroorotate oxidase family protein                       |

|           |      |                                                                                |
|-----------|------|--------------------------------------------------------------------------------|
| At4g13530 | 39.3 | expressed protein                                                              |
| At1g31820 | 40.3 | putative neutral amino acid transport protein (AtLAT3)                         |
| At2g42890 | 41.3 | RNA recognition motif (RRM)-containing protein                                 |
| At1g21000 | 42   | zinc-binding family protein                                                    |
| At4g31240 | 43   | expressed protein                                                              |
| At4g32940 | 44.5 | vacuolar processing enzyme gamma / gamma-VPE                                   |
| At1g23440 | 47   | pyrrolidone-carboxylate peptidase family protein                               |
| At3g20250 | 48.2 | pumilio/Puf RNA-binding domain-containing protein                              |
| At3g23790 | 48.8 | AMP-binding protein, putative                                                  |
| At3g14050 | 52.1 | RelA/SpoT protein, putative (RSH2)                                             |
| At3g51130 | 53.7 | expressed protein                                                              |
| At4g39140 | 53.7 | expressed protein                                                              |
| At5g10650 | 55.6 | zinc finger (C3HC4-type RING finger) family protein                            |
| At1g06570 | 55.7 | 4-hydroxyphenylpyruvate dioxygenase (HPD)                                      |
| At5g59420 | 56.9 | oxysterol-binding family protein                                               |
| At5g48180 | 61.9 | kelch repeat-containing protein                                                |
| At1g76390 | 64.1 | armadillo/beta-catenin repeat family protein / U-box domain-containing protein |
| At1g04970 | 64.5 | lipid-binding serum glycoprotein family protein                                |
| At3g62770 | 65.2 | autophagy 18a (AtATG18a)                                                       |
| At1g21410 | 65.6 | F-box family protein                                                           |
| At4g13250 | 68.2 | short-chain dehydrogenase/reductase family protein                             |
| At3g02875 | 73   | IAA-amino acid amidohydrolase 1 (AtILR1)                                       |
| At1g02470 | 74.8 | expressed protein                                                              |
| At4g33150 | 77.4 | lysine-ketoglutarate reductase/saccharopine dehydrogenase (AtLKR/AtSDH)        |
| At1g80160 | 78.7 | lactoylglutathione lyase family protein / glyoxalase I family protein          |
| At1g53580 | 78.8 | hydroxyacylglutathione hydrolase, putative / glyoxalase II, putative           |
| At4g15530 | 79.6 | pyruvate,orthophosphate dikinase                                               |
| At3g62590 | 80.5 | lipase (class 3) family                                                        |
| At4g36760 | 81   | aminopeptidase P                                                               |
| At3g03870 | 81.5 | expressed protein                                                              |
| At1g52890 | 84.3 | no apical meristem (NAM) family protein                                        |
| At3g51430 | 84.8 | strictosidine synthase, putative (AtYLS2)                                      |
| At3g23920 | 92.8 | beta-amylase, putative / 1,4-alpha-D-glucan maltohydrolase, putative           |

|           |       |                                                                                       |
|-----------|-------|---------------------------------------------------------------------------------------|
| At5g39610 | 92.8  | no apical meristem (NAM) family protein                                               |
| At5g57910 | 96.4  | expressed protein                                                                     |
| At5g54870 | 98.3  | expressed protein                                                                     |
| At2g18950 | 111.3 | putative homogentisate phytylprenyltransferase (tocopherol phytyltransferase) (AtHPT) |
| At3g45300 | 113.2 | isovaleryl-CoA-dehydrogenase (IVD)                                                    |
| At3g06810 | 116   | acyl-CoA dehydrogenase-related                                                        |
| At2g32150 | 117.4 | haloacid dehalogenase-like hydrolase family protein                                   |
| At4g02280 | 117.7 | sucrose synthase, putative / sucrose-UDP glucosyltransferase, putative                |
| At1g35190 | 119.6 | oxidoreductase, 2OG-Fe(II) oxygenase family protein                                   |
| At1g77000 | 120.9 | F-box family protein                                                                  |
| At5g18640 | 121.4 | lipase class 3 family protein                                                         |
| At3g26100 | 124   | regulator of chromosome condensation (RCC1) family protein                            |
| At2g23450 | 125.1 | putative receptor-like kinase RLK/Pelle, WAK/LRK10L-1 subfamily (AtWAKL14)            |
| At2g02390 | 125.7 | glutathione S-transferase zeta 1 (GSTZ1) (GST18)                                      |
| At3g22740 | 129.1 | homocysteine S-methyltransferase 3 (HMT-3)                                            |
| At2g46680 | 132.5 | homeobox-leucine zipper protein 7 / HD-ZIP transcription factor 7 (AtHB7)             |
| At1g69490 | 134.2 | no apical meristem (NAM) family protein                                               |
| At5g58350 | 139.2 | protein kinase family protein, HsWNKL subfamily                                       |
| At5g65110 | 141.5 | acyl-CoA oxidase (ACX2)                                                               |
| At2g43820 | 143.8 | UDP-glucuronosyl/UDP-glucosyl transferase family protein                              |
| At1g70810 | 144   | C2 domain-containing protein                                                          |
| At2g35060 | 146.8 | putative potassium transporter (AtKUP11/AtHAK11/AtKT11)                               |
| At1g17020 | 147.9 | oxidoreductase, 2OG-Fe(II) oxygenase family protein                                   |
| At3g17770 | 148.5 | dihydroxyacetone kinase family protein                                                |
| At3g10450 | 149.3 | serine carboxypeptidase S10 family protein                                            |
| At5g39050 | 150.6 | transferase family protein                                                            |
| At2g30140 | 151.7 | UDP-glucuronosyl/UDP-glucosyl transferase family protein                              |
| At5g24160 | 152.3 | squalene monooxygenase 1,2 (squalene epoxidase 1,2) (SQP1,2)(SE1,2)                   |
| At4g34180 | 152.3 | cyclase family protein                                                                |
| At2g31260 | 154.2 | autophagy 9 (AtAPG9/AtATG9)                                                           |
| At3g02150 | 155.1 | TCP family transcription factor, putative                                             |
| At1g27980 | 157.8 | pyridoxal-dependent decarboxylase family                                              |
| At3g51730 | 158.9 | saposin B domain-containing protein                                                   |

|           |       |                                                                                                                   |
|-----------|-------|-------------------------------------------------------------------------------------------------------------------|
| At1g44770 | 159.8 | expressed protein                                                                                                 |
| At1g09500 | 161.3 | cinnamyl-alcohol dehydrogenase family / CAD family (AtSAG26)                                                      |
| At5g66930 | 161.6 | expressed protein                                                                                                 |
| At1g58200 | 161.7 | mechanosensitive (MS) ion channel domain protein                                                                  |
| At1g68820 | 162.7 | putative RING-domain protein                                                                                      |
| At1g48000 | 163.7 | myb family transcription factor                                                                                   |
| At2g35940 | 167.5 | homeodomain-containing protein                                                                                    |
| At4g19860 | 172   | lecithin:cholesterol acyltransferase family protein / LACT family protein                                         |
| At3g06860 | 172.3 | fatty acid beta-oxidation multifunctional protein (AtMFP2)                                                        |
| At1g47128 | 173   | cysteine proteinase (RD21A) / thiol protease                                                                      |
| At1g27300 | 174.6 | expressed protein                                                                                                 |
| At3g60180 | 175.2 | uridylate kinase, putative / uridine monophosphate kinase, putative / UMP kinase, putative                        |
| At3g51840 | 176.7 | short-chain acyl-CoA oxidase (AtACX4)                                                                             |
| At1g58180 | 180.1 | carbonic anhydrase family protein / carbonate dehydratase family protein                                          |
| At5g10300 | 182.7 | hydrolase, alpha/beta fold family                                                                                 |
| At5g46760 | 183   | basic helix-loop-helix (bHLH) family protein                                                                      |
| At1g08920 | 183.6 | sugar transporter, putative                                                                                       |
| At1g20180 | 191.9 | At14a-related protein                                                                                             |
| At3g08860 | 194.3 | alanine--glyoxylate aminotransferase, putative / beta-alanine-pyruvate aminotransferase, putative / AGT, putative |
| At2g33380 | 195.5 | RD20 protein                                                                                                      |
| At3g10320 | 196.7 | expressed protein                                                                                                 |
| At4g16760 | 205.6 | long chain acyl-CoA oxidase (AtACX1)                                                                              |
| At4g25170 | 207.3 | expressed protein                                                                                                 |
| At3g56310 | 211.7 | alpha-galactosidase, putative / melibiase, putative / alpha-D-galactoside galactohydrolase, putative              |
| At3g15500 | 213.1 | no apical meristem (NAM) family protein (AtNAC3)                                                                  |
| At3g51860 | 215.9 | Ca <sup>2+</sup> /H <sup>+</sup> antiporter/cation exchanger, CaCA subfamily (AtCAX3/AtHCX)                       |
| At2g27150 | 216.4 | aldehyde oxidase 3 (AtAAO3)                                                                                       |
| At1g72680 | 217.8 | cinnamyl-alcohol dehydrogenase, putative                                                                          |
| At5g50380 | 223.2 | exocyst subunit EXO70 family protein                                                                              |
| At5g38710 | 226.4 | proline oxidase, putative / osmotic stress-responsive proline dehydrogenase, putative                             |
| At2g02710 | 230.1 | PAC motif-containing protein                                                                                      |
| At4g36900 | 230.1 | AP2 domain-containing protein RAP2.10 (RAP2.10)                                                                   |
| At4g21980 | 243.6 | autophagy 8a (AtATG8a/AtAPG8a)                                                                                    |

|           |       |                                                                                                               |
|-----------|-------|---------------------------------------------------------------------------------------------------------------|
| At1g05340 | 243.9 | expressed protein                                                                                             |
| At4g22820 | 250.8 | zinc finger (AN1-like) family protein                                                                         |
| At1g10070 | 251.5 | branched-chain amino acid aminotransferase 2 / branched-chain amino acid transaminase 2 (BCAT2)               |
| At2g37760 | 252.2 | aldo/keto reductase family protein                                                                            |
| At5g61820 | 252.6 | expressed protein                                                                                             |
| At1g23040 | 255.3 | extensin related protein                                                                                      |
| At4g01610 | 268.2 | cathepsin B-like cysteine protease, putative                                                                  |
| At2g28400 | 275.5 | expressed protein                                                                                             |
| At5g17380 | 277.4 | pyruvate decarboxylase family protein                                                                         |
| At3g03310 | 283.7 | lecithin:cholesterol acyltransferase family protein / LACT family protein                                     |
| At5g24870 | 285.2 | RING finger-like protein                                                                                      |
| At3g01970 | 288.9 | WRKY family transcription factor (AtWRKY45)                                                                   |
| At5g13550 | 293.1 | putative plastidic proton/sulfate co-transporter (AtSultr4.1/AtAST82)                                         |
| At5g40690 | 295   | expressed protein                                                                                             |
| At3g60690 | 295.7 | auxin-responsive family protein                                                                               |
| At3g55270 | 303.1 | MAP kinase phosphatase (MKP1)                                                                                 |
| At5g12010 | 304.8 | expressed protein                                                                                             |
| At3g22460 | 306   | cysteine synthase, putative / O-acetylserine (thiol)-lyase, putative / O-acetylserine sulfhydrylase, putative |
| At4g08290 | 312.9 | nodulin MtN21 family protein                                                                                  |
| At3g51000 | 313.9 | epoxide hydrolase, putative                                                                                   |
| At2g45570 | 314.1 | cytochrome P450 76C2, putative (AtCYP76C2/AtYLS6)                                                             |
| At1g54570 | 323.9 | esterase/lipase/thioesterase family protein                                                                   |
| At2g29460 | 331.2 | glutathione S-transferase, putative                                                                           |
| At3g06420 | 334.5 | autophagy 8h (AtATG8h/AtAPG8h)                                                                                |
| At5g18630 | 336   | lipase class 3 family protein                                                                                 |
| At5g13820 | 336.3 | telomeric DNA-binding protein 1 (TBP1)                                                                        |
| At3g20500 | 340.3 | calcineurin-like phosphoesterase family protein                                                               |
| At5g64370 | 341.5 | beta-ureidopropionase, putative / beta-alanine synthase, putative                                             |
| At3g13672 | 341.8 | seven in absentia (SINA) family protein                                                                       |
| At5g49690 | 342.7 | UDP-glucuronosyl/UDP-glucosyl transferase family protein                                                      |
| At1g09240 | 344.7 | nicotianamine synthase, putative                                                                              |
| At4g37430 | 352.3 | cytochrome P450 81F1 (AtCYP81F1/AtCYP91A2)                                                                    |
| At1g05560 | 359.9 | UDP-glucose transferase (AtUGT1)                                                                              |

|           |       |                                                                             |
|-----------|-------|-----------------------------------------------------------------------------|
| At5g45890 | 370.6 | senescence-specific SAG12 protein / cysteine proteinase, putative (AtSAG12) |
| At5g07100 | 378.8 | WRKY family transcription factor (AtWRKY26)                                 |
| At4g38540 | 380   | monooxygenase 2 (MO2)                                                       |
| At5g04040 | 380.2 | patatin-related                                                             |
| At3g26220 | 381.7 | cytochrome P450 family                                                      |
| At2g38340 | 384   | AP2 domain-containing transcription factor, putative (DRE2B)                |
| At4g29380 | 387   | protein kinase family protein / WD-40 repeat family protein                 |
| At2g47190 | 388.5 | MYB transcription factor (Atmyb2)                                           |
| At5g53970 | 391.8 | aminotransferase, putative                                                  |
| At1g77370 | 391.9 | glutaredoxin, putative                                                      |
| At4g37990 | 392.4 | mannitol dehydrogenase, putative (ELI3-2)                                   |
| At3g54620 | 393.6 | bZIP transcription factor family protein                                    |
| At5g33290 | 399.2 | exostosin family protein                                                    |
| At1g68140 | 403.4 | expressed protein                                                           |
| At5g05600 | 415.1 | oxidoreductase, 2OG-Fe(II) oxygenase family protein                         |
| At4g14020 | 416.9 | rapid alkalization factor (RALF) family protein                             |
| At2g34810 | 417.8 | FAD-binding domain-containing protein                                       |
| At3g25870 | 422.1 | expressed protein                                                           |
| At5g45900 | 426.4 | autophagy 7 (AtATG7/AtAPG7)                                                 |
| At3g60140 | 431   | glycosyl hydrolase family 1 protein                                         |
| At1g77770 | 433.5 | expressed protein                                                           |
| At4g25000 | 436.3 | alpha-amylase, putative / 1,4-alpha-D-glucan glucohydrolase, putative       |
| At3g21690 | 440.1 | putative MATE-related efflux carrier (AtDTX40)                              |
| At5g17650 | 443.4 | glycine/proline-rich protein                                                |
| At3g58750 | 444.1 | citrate synthase, glyoxysomal, putative                                     |
| At5g64230 | 445.9 | expressed protein                                                           |
| At2g23150 | 446   | multispecific vacuolar metal transporter (AtNRAMP3)                         |
| At3g05630 | 447.5 | phospholipase D, putative (PLDP2)                                           |
| At5g23340 | 450.1 | expressed protein                                                           |
| At2g43510 | 452.9 | trypsin inhibitor, putative                                                 |
| At3g61890 | 454.6 | homeobox-leucine zipper protein 12 (HB-12) / HD-ZIP transcription factor 12 |
| At4g03320 | 455.7 | chloroplast inner envelope translocon component (AtTic20-IV)                |
| At3g06780 | 456.2 | glycine-rich protein                                                        |

|           |       |                                                                                     |
|-----------|-------|-------------------------------------------------------------------------------------|
| At2g30550 | 458   | lipase class 3 family protein                                                       |
| At5g26340 | 459.8 | putative monosaccharide-proton symporter (AtSTP13)                                  |
| At5g57655 | 460.8 | xylose isomerase family protein                                                     |
| At3g04070 | 462.9 | no apical meristem (NAM) family protein                                             |
| At5g59220 | 464.9 | protein phosphatase 2C, putative / PP2C, putative                                   |
| At5g27520 | 467.9 | mitochondrial carrier protein family                                                |
| At3g04350 | 470.5 | expressed protein                                                                   |
| At2g18050 | 470.8 | histone H1-3 (HIS1-3)                                                               |
| At3g63310 | 472   | expressed protein                                                                   |
| At1g58360 | 476.8 | amino acid permease 1 (AtAAP1/AtNAT2)                                               |
| At4g30270 | 481.1 | endo-xyloglucan transferase / xyloglucan endo-1,4-beta-D-glucanase (AtSEN4/AtMERI5) |
| At1g68620 | 481.5 | expressed protein                                                                   |
| At1g73040 | 487.8 | jacalin lectin family protein                                                       |
| At3g04060 | 491.1 | no apical meristem (NAM) family protein                                             |

Table S1 (3) Known senescence regulatory genes (9 genes)

| Gene ID   | MR    | Gene Description                                                           | Reference               |
|-----------|-------|----------------------------------------------------------------------------|-------------------------|
| At3g44880 | 1.7   | maize lethal leaf-spot 1 homolog, accelerated cell death 1 (AtLLS1/AtACD1) | Pružinská et al., 2003  |
| At4g22920 | 4.7   | expressed protein                                                          | Ren et al., 2007        |
| At2g33150 | 35.7  | putative 3-ketoacyl-CoA thiolase (AtPED1)                                  | Castillo and León, 2008 |
| At4g13250 | 68.2  | short-chain dehydrogenase/reductase family protein                         | Horie et al., 2009      |
| At4g15530 | 79.6  | pyruvate, orthophosphate dikinase                                          | Taylor et al., 2010     |
| At5g39610 | 92.8  | no apical meristem (NAM) family protein                                    | Kim et al., 2009        |
| At1g69490 | 134.2 | no apical meristem (NAM) family protein                                    | Guo and Gan, 2006       |
| At2g47190 | 388.5 | MYB transcription factor (Atmyb2)                                          | Guo and Gan, 2011       |
| At5g59220 | 464.9 | protein phosphatase 2C, putative / PP2C, putative                          | Zhang and Gan, 2012     |

Table S1 (4) Containing SOC1 binding sites (7 genes)

| Gene ID   | MR    | Gene Description                                   | Reference               |
|-----------|-------|----------------------------------------------------|-------------------------|
| At4g22920 | 4.7   | expressed protein                                  | Ren et al., 2007        |
| At2g33150 | 35.7  | putative 3-ketoacyl-CoA thiolase (AtPED1)          | Castillo and León, 2008 |
| At4g13250 | 68.2  | short-chain dehydrogenase/reductase family protein | Horie et al., 2009      |
| At4g15530 | 79.6  | pyruvate,orthophosphate dikinase                   | Taylor et al., 2010     |
| At5g39610 | 92.8  | no apical meristem (NAM) family protein            | Kim et al., 2009        |
| At1g69490 | 134.2 | no apical meristem (NAM) family protein            | Guo and Gan, 2006       |
| At5g59220 | 464.9 | protein phosphatase 2C, putative / PP2C, putative  | Zhang and Gan, 2012     |
