# Supplementary material
Source: PubMed Central journal article supplement (PMC5338665)
Supplement: supp_pp.16.01457_PP2016-01457DR1_Supplemental_Materialtbl2.pdf [file supp_pp.16.01457_PP2016-01457DR1_Supplemental_Materialtbl2.pdf]

Table S2 Primers used in this study

| Destination                | Primer Names   | Primer sequences (5'-3')       |
|----------------------------|----------------|--------------------------------|
| NYE1 expression            | NYE1-RT-F      | GCAAGGATGGGCAAATAGG            |
|                            | NYE1-RT-R      | CACCGCTTATGTGACAATGAAC         |
| NYC1 expression            | NYC1-RT-F      | TTCTCAGTGGTTCGAGCATT           |
|                            | NYC1-RT-R      | AGGTAATTGACGGCTTTTCC           |
| PPH expression             | PPH-RT-F       | GGTGAGACCGTTATGGGGAAAG         |
|                            | PPH-RT-R       | GCATCAGATAGTTCACCACCTCAG       |
| SOC1 expression            | SOC1-RT-F      | ATAGGAACATGCTCAATCGAGGAGCTG    |
|                            | SOC1-RT-R      | TTTCTTGAAGAACAAGGTAACCCAATG    |
| SAG113 expression          | SAG113-RT-F    | CGGGTGGTCGTGTTATCTACTG         |
|                            | SAG113-RT-R    | CCTCCGGTCTGCTGATTACATAC        |
| NAP expression             | NAP-RT-F       | TCAACCTGATTCGGAGTCT            |
|                            | NAP-RT-R       | ATGTACCCAACTAACCAATA           |
| KAT2 expression            | KAT2-RT-F      | GTATCGGTCCAGCAGTTG             |
|                            | KAT2-RT-R      | CTCCGTTGACATTGATTTT            |
| PPDK expression            | PPDK-RT-F      | TAACAACAGAGCAAAGGAAA           |
|                            | PPDK-RT-R      | CATCTTCTTTCACACCAGTTT          |
| ORE1 expression            | ORE1-RT-F      | ACGAGGCATCAAGAATCGTC           |
|                            | ORE1-RT-R      | TCACCAATGGCAGTAGCAGA           |
| GNC expression             | GNC-RT-F       | AAATACAATCACTCTCCTCCA          |
|                            | GNC-RT-R       | AACATTATTGTCAAATCATCG          |
| GNL expression             | GNL-RT-F       | TTGCCCTAAAGGTAAACA             |
|                            | GNL-RT-R       | ATCTTGAGGGAAAACCTTGCT          |
| $\beta$ -ACTIN2 expression | ACT2-RT-F      | GGCTCCTCTTAACCCAAAGG           |
|                            | ACT2-RT-R      | CACACCATCACCAGAATCCA           |
| PPH probe                  | PPH-probe-F    | ATTATTCTGTCATATTTTTGCAACAAACAT |
|                            | PPH-probe-R    | ATGTTTGTGCAAAAATATGACAGAATAAT  |
| PPH CArG-mut probe         | PPH-mutprobe-F | ATTATTCTGTCCCCCCCCCAACAAACAT   |
|                            | PPH-mutprobe-R | ATGTTTGTGGGGGGGGGGGACAGAATAAT  |
| NYE1 probe                 | NYE1-probe-F   | AGTCGAATGACATTAAATTGAACCGAAACT |

|                       |                   |                                   |
|-----------------------|-------------------|-----------------------------------|
|                       | NYE1-probe-R      | AGTTTCGGTTCAATTTAATGTCATTCTCGACT  |
| NYE1 CArG-mut probe   | NYE1-mutprobe-F   | AGTCGAATGACCCCCCCCCCAACCGAAACT    |
|                       | NYE1-mutprobe-R   | AGTTTCGGTTGGGGGGGGGGTTCATTCTCGACT |
| SAG113 probe          | SAG113-probe-F    | ATTTACACAACAAAATATGGTAAGAATCTA    |
|                       | SAG113-probe-R    | TAGATTCTTACCATATTTTGTGTGTAAT      |
| SAG113 CArG-mut probe | SAG113-mutprobe-F | ATTTACACAACCCCCCCCCTAAGAATCTA     |
|                       | SAG113-mutprobe-R | TAGATTCTTAGGGGGGGGGTGTGTGTAAT     |
| PPH ChIP              | PPH-P1-F          | TAAGAAAGGTTATGGTTACAGC            |
|                       | PPH-P1-R          | ACGGTGTTATTTGAGTTTTCT             |
| PPH ChIP              | PPH-P2-F          | CGACCATTAGGATTTTTAGTTC            |
|                       | PPH-P2-R          | GATCTTCTTTCCATTGTGTAAC            |
| PPH ChIP              | PPH-P3-F          | ACGGGTTTTATATTGTTTGA              |
|                       | PPH-P3-R          | GATCTGACATTGCTAATTTGAC            |
| PPH ChIP              | PPH-P4-F          | CCCTACACTTAATAATACAGTATGA         |
|                       | PPH-P4-R          | CTCTGAGAGCGTTATTGAGAA             |
| PPH ChIP              | PPH-P5-F          | CACCGAACGATTGAAGTTAA              |
|                       | PPH-P5-R          | GCTATATAATAAACCCAGGAAGA           |
| PPH ChIP              | PPH-P6-F          | CGTTGGTTCATTTCACTATG              |
|                       | PPH-P6-R          | CTCCAGAGATCCAGAGAGAA              |
| NYE1 ChIP             | NYE1-P1-F         | TTGTTGTTTACAAGATACGAC             |
|                       | NYE1-P1-R         | CAAACGCAGGTATTGATG                |
| NYE1 ChIP             | NYE1-P2-F         | TCCATCAATACCTGCGTTT               |
|                       | NYE1-P2-R         | AAAGAGACACAGATTCGGCT              |
| NYE1 ChIP             | NYE1-P3-F         | ACAAGAACCAACTCAATACG              |
|                       | NYE1-P3-R         | GCTTGGATACAATTTTTTCA              |
| NYE1 ChIP             | NYE1-P4-F         | CTCTTGTTTGGGTCTATTT               |
|                       | NYE1-P4-R         | CATTACTAAGACTATGAGACCA            |
| SAG113 ChIP           | SAG113-P5-F       | TTTGTTTCCAACCTTTCTAT              |
|                       | SAG113-P5-R       | CATCACTTTCATCACAACCTTAC           |
| SAG113 ChIP           | SAG113-P6-F       | TTATTTATTATTTCAATTTATTGGA         |
|                       | SAG113-P6-R       | AACAGTGACACGAAGGATTA              |

|                            |                    |                                 |
|----------------------------|--------------------|---------------------------------|
| pCAMBIA1301 pPPH(1110)     | PPH-1110-Kpn1-F    | ATAGGTACCGTGGGATTAAATTGCGAGGAAA |
|                            | PPH-1110-Xho1-R    | ATACTCGAGAACAAGTTCCTGCAAATGAACA |
| pCAMBIA1301 PPH            | PPH-Sal1-F         | ATAGTCGACATGGAGATAATCTCACTG     |
|                            | PPH-Spe1-R         | ATAACTAGTCTATGCAGACTTCCCTCC     |
| pAbAi pPPH(1110bp)         | PPH-1110-Kpn1-F    | ATAGGTACCGTGGGATTAAATTGCGAGGAAA |
|                            | PPH-1110-Xho1-R    | ATACTCGAGAACAAGTTCCTGCAAATGAACA |
| pAbAi pPPH(317bp)          | PPH-317-Kpn1-F     | CGGGTACCATAGTGATTAAACCATTTC     |
|                            | PPH-317-Xho1-R     | ATACTCGAGCGTTTTTATCGAGTTTTT     |
| pGADT7 SOC1                | SOC1-Nde1-F        | ATACATATGATGGTGAGGGGCAAACACTCA  |
|                            | SOC1-BamH1-R       | ATAGGATCCTCACTTTCTTGAAGAACAAG   |
| pMAL-c5G SOC1              | SOC1-Nde1-F        | ATACATATGATGGTGAGGGGCAAACACTCA  |
|                            | SOC1-BamH1-R       | ATAGGATCCTCACTTTCTTGAAGAACAAG   |
| pTA7002 SOC1               | SOC1-Xho1-F        | ATACTCGAGATGGTGAGGGGCAAACACTCA  |
|                            | SOC1-Spe1-R        | ATAACTAGTTCCTTTCTTGAAGAACAAG    |
| pCAMBIA1302 SOC1           | SOC1-GFP-Kpn1-F:   | ATAGGTACCATGGTGAGGGGCAAACACTCA  |
|                            | SOC1-GFP-BamH1-R:  | ATAGGATCCCTTTCTTGAAGAACAAGG     |
| pGreen II 0800 pNYE1       | NYE1-1519-Sal1-F   | ATAGTCGACTCTGAGATCCAAATCCCTA    |
|                            | NYE1-1519-Spe1-R   | ATAACTAGTCTCTGCTCTTGAACC        |
| pGreen II 0800 pSAG113     | SAG113-1000-Kpn1-F | ATAGGTACCGAAGTATTCACGCACCAA     |
|                            | SAG113-1000-Xho1-R | ATACTCGAGGTGATCGTCAAACACTATT    |
| pGreen II 0800 pPPH        | PPH-1110-Kpn1-F    | ATAGGTACCGTGGGATTAAATTGCGAGGAAA |
|                            | PPH-1110-Xho1-R    | ATACTCGAGAACAAGTTCCTGCAAATGAACA |
| pGreen II 0800 pmPPH       | mPPH-F             | ATTATTCTGTCCCCCCCCCAACAAACAT    |
|                            | mPPH-R             | ATGTTTGTGGGGGGGGGGGACAGAATAAT   |
| Genotyping of <i>soc1</i>  | <i>soc1</i> -LP    | AAGGATGAGGTTTCAAGCGTC           |
|                            | <i>soc1</i> -RPC   | TGGCGAATTCATAAAGTTTGC           |
|                            | LBb1.3             | ATTTTGCCGATTCGGAAC              |
| Genotyping of <i>pph-1</i> | <i>pph-1</i> -LP:  | CTACCAATCCTGGACTCCTCC           |
|                            | <i>pph-1</i> -RPC: | GGCGGGATTTAATCAAGAGAC           |
|                            | LBb1.3             | ATTTTGCCGATTCGGAAC              |
